1 **Structural basis of TRPC4 regulation by calmodulin and pharmacological agents**

2

3 Deivanayagabarathy Vinayagam<sup>1</sup>, Dennis Quentin<sup>1</sup>, Oleg Sitsel<sup>1</sup>, Felipe Merino<sup>1,2</sup>, Markus  
4 Stabrin<sup>1</sup>, Oliver Hofnagel<sup>1</sup>, Maolin Yu<sup>3</sup>, Mark W. Ledebner<sup>3</sup>, Goran Malojcic<sup>3</sup>, Stefan  
5 Raunser<sup>1</sup>

6

7 <sup>1</sup>Department of Structural Biochemistry, Max Planck Institute of Molecular Physiology, 44227  
8 Dortmund, Germany

9 <sup>2</sup>Current address: Department of Protein Evolution, Max Planck Institute for Developmental  
10 Biology, 72076 Tübingen, Germany

11 <sup>3</sup>Goldfinch Bio, 215 First St, Cambridge, MA 02142, USA

12 Correspondence: [stefan.raunser@mpi-dortmund.mpg.de](mailto:stefan.raunser@mpi-dortmund.mpg.de)

13

14

15 **ABSTRACT**

16 Canonical transient receptor potential channels (TRPC) are involved in receptor-operated  
17 and/or store-operated Ca<sup>2+</sup> signaling. Inhibition of TRPCs by small molecules was shown to be  
18 promising in treating renal diseases. In cells, the channels are regulated by calmodulin.  
19 Molecular details of both calmodulin and drug binding have remained elusive so far. Here we  
20 report structures of TRPC4 in complex with a pyridazinone-based inhibitor and a pyridazinone-  
21 based activator and calmodulin. The structures reveal that both activator and inhibitor bind to  
22 the same cavity of the voltage-sensing-like domain and allow us to describe how structural  
23 changes from the ligand binding site can be transmitted to the central ion-conducting pore of  
24 TRPC4. Calmodulin binds to the rib helix of TRPC4, which results in the ordering of a  
25 previously disordered region, fixing the channel in its closed conformation. This represents a  
26 novel calmodulin-induced regulatory mechanism of canonical TRP channels.

27

28

## 29 INTRODUCTION

30 Transient receptor potential (TRP) ion channels mediate a plethora of vital cellular functions,  
31 including nociception, mechanosensation and store-operated  $\text{Ca}^{2+}$  signaling (Clapham, 2003).  
32 Members belonging to the canonical TRP subfamily (TRPC) are involved in neuronal  
33 development and plasticity, as well as in vasorelaxation and kidney dysfunction (Hall et al.,  
34 2019; Kochukov et al., 2012; Phelan et al., 2013; Riccio et al., 2009). As a result, malfunction  
35 is often linked to pathologies such as neurological disorders and cardiac hypertrophy (Selvaraj  
36 et al., 2010; Wu et al., 2010). This class of non-selective cation channels can be further  
37 subdivided into TRPC1/4/5, TRPC2 (which is a pseudogene in humans) and TRPC3/6/7  
38 groups, based on their sequence similarity. Within the TRPC1/4/5 sub-group, TRPC4 and  
39 TRPC5 share the highest sequence identity of 70% (Plant and Schaefer, 2003). Both proteins  
40 can form homo-tetrameric channels that allow the passage of  $\text{Ca}^{2+}$ , but also  $\text{Na}^{+}$  ions to a lesser  
41 extent (Minard et al., 2018; Owsianik et al., 2006). In contrast, TRPC1, which shares  
42 approximately 48% identity with TRPC4/5, rather participates in the formation of hetero-  
43 tetrameric TRPC1/4/5 channels (Bröker Lai et al., 2017). Whether or not functional homo-  
44 tetrameric TRPC1 channels exist *in vivo* and what their potential physiological impact may be,  
45 is currently not known.

46 TRPC4 is widely expressed in various tissues associated with the nervous-,  
47 cardiovascular- and immune system (Freichel et al., 2014). It has been shown to be necessary  
48 for neurite outgrowth and its expression is upregulated in axonal regeneration after nerve injury  
49 (Wu et al., 2007). Channel activation results in a depolarization of the cell membrane, followed  
50 by a surge of intracellular  $\text{Ca}^{2+}$  levels. The regulation of the activity of TRPC channels,  
51 however, is multi-faceted and ranges from modulation by endogenous and dietary lipids to  
52 surface receptors, the redox environment and various types of cations (Jeon et al., 2012). Even  
53 within the TRPC1/4/5 subgroup, regulatory mechanisms can differ and are dependent on the  
54 respective cellular environment in combination with the experimental method used for the  
55 measurement (Plant and Schaefer, 2003). TRPC4 interacts with multiple proteins that can  
56 modulate its activity. This includes the ER-resident calcium sensor Stim1, the lipid binding  
57 protein SESTD1 and G-protein  $G_{\alpha i2}$  (Jeon et al., 2012; Lee et al., 2010; Mieke et al., 2010; Zeng  
58 et al., 2008).

59 Several studies also established a role for TRPC4 as a store-operated channel (SOC)  
60 (Wang et al., 2004; Warnat et al., 1999). Here, two key proteins, calmodulin (CaM) and inositol  
61 1,4,5-triphosphate receptor ( $\text{IP}_3\text{R}$ ), compete for the same binding site on TRPC4 (Mery et al.,  
62 2001; Tang et al., 2001). First,  $\text{Ca}^{2+}$ -dependent binding of CaM inhibits the channel in the

63 resting state. When intracellular  $\text{Ca}^{2+}$  levels decrease, the activating  $\text{IP}_3$  receptor directly  
64 interacts with TRPC4, displacing CaM, to restore channel activity (Kanki et al., 2001). This  
65 process, which is also known as conformational coupling, represents a primary regulation  
66 mechanism of gating for SOCs (Berridge and Berridge, 2004). However, a detailed mechanistic  
67 understanding of CaM inhibition or  $\text{IP}_3$ R activation remains elusive.

68 Due to their implication in various diseases, TRPC channels also constitute a prime  
69 target for pharmacological intervention by small molecules (Minard et al., 2018). Activation of  
70 channels by the natural compound (-)-Englerin A (EA), which shows high potency and  
71 selectivity for TRPC4/5, inhibits tumor growth of renal cancer cells through increased  $\text{Ca}^{2+}$   
72 influx (Akbulut et al., 2015; Carson et al., 2015). Other activators include riluzole, BTB and  
73 the glucocorticoid methylprednisolone (Beckmann et al., 2017; Richter et al., 2013). However,  
74 these compounds are typically either less potent or show varying specificity.

75 Inhibitors of TRPC4/5 are mostly used to target renal diseases such as focal segmental  
76 glomerulosclerosis (FSGS) (Mundel et al., 2019; Zhou et al., 2017), but can also have a  
77 therapeutic effect on the central nervous system (CNS) (Just et al., 2018; Yang et al., 2015).  
78 Currently, two compounds are in clinical trials aiming to treat a proteinuric kidney disease and  
79 anxiety disorder/depression, conducted by Goldfinch Bio (NCT03970122) and  
80 Hydra/Boehringer Ingelheim (NCT03210272), respectively (Mundel et al., 2019; Wulff et al.,  
81 2019). While xanthine-based inhibitors, such as HC-070 and HC-608 (formerly known as  
82 Pico145) have assisted in advancing the field of pharmacological modulation of TRPC1/4/5  
83 due to their exceptional high potency, they suffer from poor physiochemical properties such as  
84 low solubility (Just et al., 2018; Rubaiy et al., 2017).

85 Recently, a novel class of small molecule modulators selective for TRPC4/5 was  
86 identified in a high-throughput screen, building up on a piperazinone/pyridazinone scaffold (Yu  
87 et al., 2019). Among this class of modulators are the activator GFB-9289 and the inhibitor GFB-  
88 8438. In particular, GFB-8438 showed promise as a potential drug for the treatment of  
89 proteinuric kidney disease, exhibiting overall favorable *in vitro* and *in vivo* properties (Yu et  
90 al., 2019). *In vitro*, mouse podocytes were protected from protamine-induced injury when  
91 treated with the inhibitor. Importantly, GFB-8438 also demonstrated robust efficacy in a  
92 hypertensive deoxycorticosterone acetate (DOCA)-salt rat model of FSGS, in which both  
93 albumin concentration and total protein levels were significantly reduced (Yu et al., 2019).  
94 However, information on the TRPC4/5 binding site and the mode-of-action of this novel  
95 compound class are still lacking. To date, the structures of TRPC6 in complex with the activator  
96 AM-0883 and the inhibitor AM-1473 are the only source of information regarding how

97 modulation of TRPC channels is mediated on a molecular scale (Bai et al., 2020). Although  
98 insights gained from different apo structures of TRPC4/5 have advanced our understanding of  
99 this medically important TRPC subfamily (Duan et al., 2018; Vinayagam et al., 2018), a  
100 molecular understanding of pharmacological modulation by small molecules as well as key  
101 regulatory proteins such as CaM and IP<sub>3</sub>R remains unknown. Here we report four cryo-EM  
102 structures of TRPC4 in its apo form and in complex with the inhibitor GFB-8438, the activator  
103 GFB-9289 and CaM, respectively. Based on the analysis of the structures we propose  
104 mechanistic pathways by which CaM and small molecules exert their action to modulate the  
105 activity of the channel.

106

107

## 108 **Results and discussion**

109

### 110 **Cryo-EM structures of full-length TRPC4 in complex with a small molecule inhibitor and** 111 **activator**

112 We previously reported the high-resolution apo structure of zebrafish TRPC4 in amphipols in  
113 its closed state (Vinayagam et al., 2018). To understand how channel activity is modulated by  
114 pharmacological compounds, we examined the complex of TRPC4 with the inhibitor GFB-  
115 8438 and the activator GFB-9289. Both compounds belong to the same novel class of TRPC4/5-  
116 selective modulators, which contain a common piperazinone/pyridazinone core. We first  
117 conducted fluorescent dye based Ca<sup>2+</sup> uptake assays on TRPC4-transfected HEK293T cells to  
118 confirm their inhibitory or activating effects. GFB-8438 indeed acted as inhibitor of TRPC4,  
119 whereas GFB-9289 specifically activated Ca<sup>2+</sup> influx by TRPC4 (Figure S1A).

120 We then formed the TRPC4 complexes with the respective small molecules. We did not  
121 add cholesteryl hemisuccinate and exogenous lipid molecules during purification to exclude  
122 potential interference with ligand binding. Using cryogenic electron microscopy (cryo-EM) and  
123 single particle analysis, we then determined the structures of GFB-8438-bound and GFB-9289-  
124 bound TRPC4 to an average resolution of 3.6 Å and 3.2 Å, respectively (Figure 1, 2, Figure S2,  
125 S3).

126 Overall, the structures of these complexes are similar to the previously determined  
127 TRPC4 apo structure (Figure 1A, 2A, Figure S4). The architecture is typical for the canonical  
128 TRP channel family with a transmembrane region (TM domain) where the pore region of one  
129 protomer domain-swaps with the voltage-sensor-like (VSL) domain of another. The cytosolic  
130 domain harboring the ankyrin repeat (AR) embraces the coiled coil helix in the center and the

131 N-terminal ankyrin domain is associated to the TM domain via a helical linker domain. The C-  
132 terminal helix connects to the TM domain through the rib and TRP helix which also bridges the  
133 TM domain with the helical linker domain (Figure S5).

134

### 135 **TRPC4 in complex with inhibitor GFB-8438**

136 In the GFB-8438-bound structure, we found an additional density compared to the apo structure  
137 inside a cavity formed by the VSL domain, TRP helix and re-entrant loop (Figure 1B). The  
138 shape of the density clearly indicated that it corresponds to the bound inhibitor. The shape and  
139 the surrounding chemical environment allowed us to build the model of the inhibitor inside this  
140 extra density (Figure 1C,D). Notably, the inhibitor AM-1473, which belongs to a different class  
141 of small molecules, was shown to bind to a similar region in TRPC6 (Bai et al., 2020).

142 The chemical structure of GFB-8438 consists of three six-membered rings: a  
143 pyridazinone ring and trifluoromethyl benzyl group at opposing ends are connected by a central  
144 1,4-disubstituted piperazinone ring (Figure 1C). Its binding to the protein is predominantly  
145 mediated by hydrophobic contacts (Figure 1C,D). The nitrogen, the chlorine, and the oxo group  
146 of the pyridazinone ring form hydrogen bonds as well as halogen bonds with N442 of helix S3,  
147 Y373 of helix S1 and S488 of the S4 helix, respectively. The hydrophobic part of the  
148 pyridazinone ring is stabilized by a  $\pi$ - $\pi$  stacking interaction with F413 of helix S2 on one side  
149 and M441 of helix S3 on the opposite side. The middle piperazinone ring forms a hydrophobic  
150 interaction with the Y373 while the oxo-group of the ring is engaged in a hydrogen bond with  
151 R491 of the S4 helix. The tri-fluoro benzyl ring engages in a hydrophobic interaction with L495  
152 of helix S4, and the fluoride group is involved in a hydrogen bond with H369 of S1 and Y646  
153 from the TRP helix. The residues interacting with the inhibitor are identical between TRPC4  
154 and TRPC5 (Figure S6) indicating a similar ligand binding mode in TRPC5, which is supported  
155 by their close IC<sub>50</sub> values of 0.18 and 0.29  $\mu$ M for TRPC5 and TRPC4, respectively (Yu et al.,  
156 2019).

157

### 158 **TRPC4 in complex with activator GFB-9289**

159 As in the GFB-8438 inhibitor-bound structure, we found an extra density inside the VSL  
160 domain region of activator-bound TRPC4 (Figure 2A, B). In addition to the surrounding  
161 chemical environment, the high resolution of the map enabled us to unambiguously build the  
162 ligand (Figure S3).

163 Similar to the inhibitor, the chemical structure of the activator consists of three six-  
164 membered rings: a pyridazinone ring and a cyclohexyl group at opposing ends are connected

165 by a central 1,4-disubstituted piperazinone ring (Figure 2C). The key difference between the  
166 molecules is terminal ring, which is a tri-fluorinated benzyl ring in the case of the inhibitor and  
167 a cyclohexyl ring in the activator. Given that the activator and the inhibitor share a common  
168 chemical scaffold structure with the difference limited to one part of the molecule, it is not  
169 surprising that they bind to the same region. The competitive binding of the compounds to  
170 TRPC4 is consistent with observed functional data. After preincubation with the inhibitor, the  
171 activator does not have a measurable functional effect on the channel (Figure S1). However,  
172 considering the same binding mode and similar structure, it is intriguing that binding of the two  
173 related small molecules have opposing effects on the activity of the protein. This is reminiscent  
174 of TRPM8, where the activator and inhibitor bind to the same pocket of the VSL domain (Diver  
175 et al., 2019; Yin et al., 2018). This suggests that the VSL domain is a highly sensitive regulatory  
176 domain that responds to subtle stimuli in its small ligand-binding pocket in order to govern the  
177 function of this large tetrameric macromolecular complex. In addition, such opposing effects  
178 of closely related small molecules have also been described in the case of TRPC5 (Rubaiy et  
179 al., 2018).

180 Most interactions of the activator with the S1-S4 helices are the same as they are for the  
181 inhibitor, with small residue movements to accommodate the slightly different structure of the  
182 activator (Figure 2C, D). In the case of the activator, GFB-9289, Y373 forms hydrophobic  
183 interactions with the cyclohexyl and piperazinone rings. A reconfiguration of the binding  
184 interactions to the pyridazinone ring now includes hydrogen bonds to S488 side chain via its  
185 oxygen atom, unlike the halogen bond with Y373 observed in the inhibitor complex described  
186 above. The reduced size of the cyclohexyl group results in the reorientation of interacting  
187 residues. Importantly, Y646 of the TRP helix and H369 of the S2 helix do not interact with the  
188 compound and are rotating away from the interface (Figure 3A). This reduced stabilization of  
189 the activator (GFB-9289) is the likely cause for the weaker binding in comparison to the  
190 inhibitor (GFB-8438, Figure S1).

191

### 192 **Structural rearrangements in the ligand binding pocket**

193 To understand the structural rearrangement upon ligand binding, we compared the ligand-  
194 bound structures with the structure of TRPC4 in the apo state (Vinayagam et al., 2018) (Figure  
195 3B-D). In the apo structure, some of the residues of the ligand binding pocket interact with each  
196 other via hydrophobic (Y373, F413, M441) and hydrophilic interactions (R491 and E438)  
197 (Figure 3B). Upon ligand binding, these residues move and reshape the pocket to accommodate  
198 the ligands, indicating an induced-fit mechanism or conformational selection (Hammes et al.,



199 2009) (Figure 3B-D). Similarly, the side chains of L495 and H369 rotate, move or flip to  
200 accommodate and stabilize the interaction with the tri-fluoro benzyl group in the case of the  
201 inhibitor and arrange differently in the case of the activator (Figure 3B,C). These ligand-specific  
202 arrangements of the ligand binding pocket highlight its plasticity.

203 The inhibitor GFB-8438 has been shown to be more specific for TRPC4/5 than TRPC6  
204 (Yu et al., 2019). Comparison of the TRPC4/5 binding pocket with TRPC6 reveals a critical  
205 difference in ligand binding residues (Figure 3D). The cognate N442 residue in TRPC4/5 is  
206 replaced by L534 in TRPC6, which abrogates hydrogen bond formation with the nitrogen atom  
207 of pyridazinone. F413, which in TRPC4 forms a  $\pi$ - $\pi$  interaction with the pyridazinone ring, is  
208 replaced by the weakly interacting hydrophobic residue M505 in TRPC6 (Figure 3E,F). These  
209 crucial substitutions in the ligand binding pocket explain the much lower binding affinity of  
210 TRPC6 for GFB-8438 ( $>30 \mu\text{M}$ ) (Yu et al., 2019).

211 Interestingly, we have observed that the inhibitor, GFB-8438, interacts with both the  
212 TRP helix and the VSL domain, whereas the activator, GFB-9289, exclusively interacts with  
213 the VSL domain (Figure 3G). We hypothesize that the direct stabilizing interaction with the  
214 TRP helix constrains it and the adjacent S6 helix thereby arresting the channel in a closed state.  
215 In this manner, the allosteric interactions within a peripheral binding site propagate to the ion  
216 pore in the center of the protein. To explore our hypothesis further, we compared the inhibitor  
217 binding to the VSL domain observed by us with that of other TRP family members. Indeed, all  
218 inhibitors interact with the TRP helix. This indicates that the above described mechanism may  
219 also be generally valid for other inhibitors that bind to the VSL domain of different TRP  
220 channels. However, in the case of TRPM8, both the activator and inhibitor were found to  
221 interact with the TRP helix. Yet the connecting loop between the TRP helix to the S6 helix was  
222 disordered in both structures. Therefore, we believe that TRPM8 utilizes a different mechanism  
223 to conduct the ligand mediated signal than the TRP channels examined here (Figure 3G).

224

#### 225 **Ligand-induced changes in TRPC4**

226 Besides the structural rearrangements in the ligand binding pockets, we did not observe major  
227 ligand-induced conformational changes in TRPC4. Similar to the apo structure, the channel is  
228 closed at the lower gate in the structure of the inhibitor-bound TRPC4. The lower gate shows a  
229 minimal constriction defined by residue N621 with a van der Waals surface diameter of  
230 approximately  $0.7 \text{ \AA}$ , which is too narrow for  $\text{Ca}^{2+}$  to pass through (Figure 4A-B). Surprisingly,  
231 the activator-bound structure shows also a closed channel. The recently reported structure of  
232 TRPC6 bound to an activator also exhibits a closed conformation (Bai et al., 2020). The opening

233 probability of TRPC channels is generally very low and the opening time is short (<1 ms)  
234 (Hofmann et al., 1999; Jung et al., 2003; Schaefer et al., 2000). Therefore, even in the presence  
235 of an activator, the closed state seems to be energetically more favorable than the open state.

236 We found small differences in the selectivity filter. Surprisingly, the backbone residues  
237 F576 and G577 forming the TRPC4 selectivity filter show a slightly wider radius in the ligand-  
238 bound structures compared to the apo structure. This could be due to a density in the selectivity  
239 filter which we did not observe in the apo structure, indicating that a cation, presumably  $\text{Ca}^{2+}$   
240 or  $\text{Na}^+$  is residing in the filter, while the filter is empty in the apo form (Figure 4A).

241 In both ligand-bound structures a characteristic lipid density is situated close to the pore  
242 which is either phosphatidic acid or ceramide-1-phosphate, its structural analogue (Vinayagam  
243 et al., 2018). Since we did not add lipids during our purification, this annular lipid likely co-  
244 purified with the protein. Each of the two lipid tails is placed like an anchor between  
245 neighbouring S5 and S6 helices by forming several hydrophobic interactions (Figure S7). We  
246 hypothesize that this lipid site could be crucial for the gating of the channel, since small  
247 molecules can bind in this region, and modulate the channel as observed in activator-bound  
248 TRPC6 (Bai et al., 2020).

249 We identified density for a putative cation in the  $\text{Ca}^{2+}$  binding site of the VSL domain  
250 in the ligand-bound structures (Figure 4C and S8A), also present in the apo structure of TRPC4  
251 (Vinayagam et al., 2018). The ion binding site is coordinated by the carbonyl oxygen of D438  
252 and N435 of the S3 helix, along with E417 and Q420 of the S2 helix, which are the favourable  
253 coordination residues for an alkaline earth metal ion such as  $\text{Ca}^{2+}$  (Zheng et al., 2017a).  
254 Interestingly, not only a hydroxyl group of Y429 is close to the density but also an oxo group  
255 of the ligands, which could complete the octahedral coordination of  $\text{Ca}^{2+}$  via a bridging water  
256 molecule. The presence of the ligands could thus help to stabilize bound  $\text{Ca}^{2+}$ .

257 TRPC5 and TRPC4 activation has been reported to be  $\text{Ca}^{2+}$ -dependent (Plant and  
258 Schaefer, 2003). Similar to our observation here, the binding of  $\text{Ca}^{2+}$  has been described for  
259 TRPM4 and TRMP8, both of which are also known to be activated by  $\text{Ca}^{2+}$ . The structures of  
260 these channels are in a closed conformation representing the desensitized state (Autzen et al.,  
261 2018; Diver et al., 2019). Considering this, the molecular role of the VSL domain-bound  
262 calcium ion in activation or desensitization of the TRPC4 channel is a compelling topic for  
263 further investigation.

264

265 **Structure of TRPC4 in complex with calmodulin**



266 Calmodulin (CaM) has been shown to bind and regulate the TRPC4 channel (Zhu, 2005; Tang  
267 et al., 2001). At high  $\text{Ca}^{2+}$  concentrations in the cytosol, CaM binds in its  $\text{Ca}^{2+}$ -bound state to  
268 TRPC4 and inhibits  $\text{Ca}^{2+}$  entry. At low  $\text{Ca}^{2+}$  concentrations, CaM changes its conformation and  
269 dissociates from the channel. The store-operated  $\text{Ca}^{2+}$  entry pathway hypothesis (Tang et al.,  
270 2001) further proposes that CaM binding to the channel at resting state prevents TRPC4 from  
271 being spontaneously activated by  $\text{IP}_3$  receptors. When  $\text{Ca}^{2+}$  levels in the endoplasmic reticulum  
272 (ER) - but not in the cytosol - drop, the affinity of the  $\text{IP}_3$  receptor to TRPC4 increases and CaM  
273 is displaced through a conformational coupling mechanism (Rosado et al., 2015; Tang et al.,  
274 2001). This activates the TRP channel. To further understand the mechanistic process of CaM  
275 inhibition, we set out to determine the structure of the TRPC4-CaM complex.

276 We first performed a pull-down experiment using a CaM Sepharose column with  
277 TRPC4 acting as bait at high  $\text{Ca}^{2+}$  concentrations to biochemically test CaM binding to TRPC4.  
278 As expected, TRPC4 was trapped in the CaM column in presence of  $\text{Ca}^{2+}$  and released by  
279 chelating the  $\text{Ca}^{2+}$  with EGTA (Figure S9). This is in line with previous studies which used  
280 smaller peptides of TRPC4 instead of the full-length protein used in our experiment (Tang et  
281 al., 2001). Since  $\text{Ca}^{2+}$  is necessary for the binding of CaM to TRPC4, we prepared the protein  
282 sample in the detergent LMNG (Lauryl Maltose Neopentyl Glycol) instead of following the  
283 amphipol exchange methodology that we used previously. Amphipols are known to interact  
284 with  $\text{Ca}^{2+}$  ions and could thus disrupt CaM binding (Le Bon et al., 2018). We then determined  
285 the structure of TRPC4 in LMNG in complex with CaM. For the TRPC4-CaM complex, we  
286 added a 10-fold molar excess of CaM to tetrameric TRPC4 in the presence of 10 mM calcium  
287 chloride throughout the purification process after detergent extraction.

288 The CaM complex sample yielded a 3.3 Å map with applied C4 symmetry (Figure S10).  
289 We observed additional density surrounding the rib helix termini protruding from the protein  
290 core, although the resolution in this region was lower than at the core of the protein (Figure  
291 S11a). Besides its localization at the periphery we suspected that an incomplete saturation of  
292 TRPC4 by CaM could be the reason for the lower local resolution. Hence, we performed 3D  
293 sorting without applied symmetry to resolve the subpopulations with different binding  
294 stoichiometries. 13% of the TRPC4 channels had one CaM bound, 35% and 31% had two or  
295 three bound, respectively and only 20% were fully saturated (Figure 5A). In addition, some of  
296 the densities corresponding to CaM were less defined than others. The classes with clear CaM  
297 densities were then rotated and properly aligned (Figure S10). The final local resolution of CaM  
298 improved to a resolution of 4 - 5 Å (Figure S11a). We could clearly identify four helices that  
299 correspond to the helices of one lobe of CaM and flexibly fitted this part of the protein (Figure

300 5B). The other CaM lobe was not resolved, indicating that this part of the protein is more  
301 flexible in this complex.

302 CaM not only binds to the tip of the rib helix (residues 691-703) and the following loop  
303 (residues 677-690) that connects the rib helix with a newly identified helix (residues 666-676),  
304 but it also interacts with the adjoining loop region comprising residues 273-277 (Figure 5C).  
305 The core region of CaM binds to TRPC4 by forming hydrophobic interactions while the  
306 peripheral residues of CaM are stabilized by hydrophilic interactions (Figure 5D) that are  
307 typically observed in CaM-protein/peptide complexes (Villalobo et al., 2018) .

308 The interacting residues of TRPC4 partially overlap with a peptide corresponding to  
309 residues 695-724 that have been previously shown to interact with CaM (Tang et al., 2001).  
310 Since our structure revealed that CaM only interacts with residues 688-703, we conclude that  
311 the residues 695-703 are sufficient for CaM binding *in vitro*. Residues 704-725 of the rib helix  
312 interact with the protein core and are inaccessible for interaction with CaM.

313

314

#### 315 **CaM-induced changes in TRPC4**

316 To be able to identify CaM-induced structural effects, we also solved the structure of TRPC4  
317 in its apo state under the same conditions as for the TRPC4-CaM complex without the addition  
318 of external lipids. The apo structure of TRPC4 in LMNG reached a resolution of 2.85 Å,  
319 allowing us to build an atomic model with high accuracy (Figure S11B and S12). The overall  
320 structure is similar to the previously reported amphipol-exchanged apo structure of TRPC4 in  
321 the closed state (Vinayagam et al., 2018) (Figure S4). However, in both the apo and calmodulin-  
322 bound structure, we observed for the first time an additional density corresponding to a  
323 horizontal helix located at the transmembrane-cytoplasmic interface outside the transmembrane  
324 core (residues 666-676) (Figure 5B-D, Figure S12). The hydrophobic residues of this helix face  
325 the transmembrane helix and the inner lipid leaflet while the hydrophilic residues project into  
326 the cytoplasm, giving the helix an amphipathic nature.

327 Comparing the TRPC4 apo structure with that of TRPC4-CaM, we could identify only  
328 small differences in the center of the channel. Both, the apo and CaM bound TRPC4 structures  
329 showed the same constriction of 0.7 Å defined by N621 at the lower gate indicating the closed  
330 state of the channel (Figure S13). Interestingly, when CaM binds to TRPC4 the selectivity filter  
331 is slightly widened and contains a density that likely corresponds to Ca<sup>2+</sup> or Na<sup>+</sup> as in the case  
332 of the activator- and inhibitor-bound state. We observed a much stronger density at the Ca<sup>2+</sup>

333 binding site in the VSL domain for the CaM-bound structure compared to apo TRPC4,  
334 presumably due to the high Ca<sup>2+</sup> concentration we used for preparing the CaM-TRPC4 complex

335 The differences between TRPC4-CaM and the TRPC4 apo structure are more  
336 pronounced at the periphery of the channel. There, CaM binding stabilizes a longer stretch  
337 (residues 677 -692) of TRPC4 that is highly flexible in the apo state of the channel (Figure 5B  
338 and C). Therefore, binding of CaM to this region of TRPC4 likely reduces the overall flexibility  
339 of the channel, fixing it in its closed state (Figure 5E). Since one TRPC4 tetramer can bind up  
340 to four CaMs, this suggests that the number of CaMs simultaneously bound to TRPC4 could  
341 fine tune the level of channel activity.

342 Importantly, this mechanism of CaM-mediated regulation completely differs from that  
343 described for other TRP channels, such as TRPV5 and TRPV6 (Hughes et al., 2018; Singh et  
344 al., 2018). There, CaM binds in a 1:4 stoichiometry, with one CaM binding to the center of the  
345 tetrameric channels via the open cytoplasmic part, plugging it with its protruding lysine residue  
346 (Figure 6) (Hughes et al., 2018; Singh et al., 2018). In the TRPC4-CaM complex structure, the  
347 central core of the cytoplasmic region is occupied by a coiled coil helix. Thus, CaM cannot  
348 access the core of the cytoplasmic region in TRPC4. Other channels of the TRPC subfamily  
349 also contain this coiled coil helix and the rib helix (Duan et al., 2018; Tang et al., 2018) .  
350 Therefore, we propose that the novel mechanism of CaM inhibition via binding to the rib helix  
351 is paradigmatic for all TRPCs.

352

### 353 **Model for TRPC4 modulation**

354 In this study we determined the structure of TRPC4 in complex with inhibitor GFB-8438,  
355 activator GFB-9289 and its endogenous regulator CaM. Analysis of these structures allows us  
356 to propose a model describing the molecular mechanism of modulation and regulation of  
357 TRPC4 activity (Figure 7a). In our model, the channel switches between its closed and open  
358 conformation, with the closed conformation being more energetically favoured. Therefore,  
359 activation does not result in a static opening of the channel, but rather increases the open time  
360 interval. The channel only transiently opens and allows the passage of Ca<sup>2+</sup>. Therefore, we also  
361 only obtained the structure of TRPC4 in its closed conformation although the activator is bound  
362 to the protein. Inhibition has the reverse effect, i.e. the open time interval is strongly decreased  
363 and an inhibitor locks the channel in its closed conformation. In our case, the inhibitor and the  
364 activator bind to the same position, namely the VSL domain which is connected to the gate by  
365 the TRP helix. Thus, subtle conformational changes in this sensitive regulatory domain appear  
366 to shift the equilibrium between the open and closed states.

367 CaM does not bind to the VSL domain, which resides in the membrane and is therefore  
368 not directly accessible. However, it stabilizes other parts of the protein that are connected to the  
369 VSL domain. In particular, it binds to the tip of the rib helix, which results in the stabilization  
370 of the loop and the helix that connects it to the VSL domain. Thus, the binding of CaM to the  
371 rib helix has the same consequence as the binding of an inhibitor to the VSL domain, locking  
372 the channel in its closed conformation. Interestingly, the rib helix has also been shown to be the  
373 binding site for the IP<sub>3</sub> receptor which acts as an activator of TRPC4 (Tang et al., 2001).  
374 Although we do not yet know the structural details of this interaction, it is likely that inhibition  
375 by CaM and activation by IP<sub>3</sub> receptor require the use the same binding site, while resulting in  
376 opposing effects. This is similar to the activator/inhibitor pair binding to the VSL domain. Thus,  
377 TRPC4 contains at least two molecular switch regions that can be modulated by the binding of  
378 small molecules or regulatory proteins (Figure 7b). Consequently, the signals of different  
379 switches are integrated and together determine the final state and the degree of activation of the  
380 channel. Our model not only explains how TRPC4 activity is regulated by CaM in the cellular  
381 context, but also opens new possibilities for knowledge-driven pharmacological manipulation  
382 of this therapeutic target.

383  
384

## 385 **Materials and Methods**

386

### 387 **Protein purification and expression**

388 Zebrafish TRPC4<sub>DR</sub> was prepared as described previously (Vinayagam et al., 2018). In brief,  
389 residues 2-915 of *Danio rerio* TRPC4 were cloned into the pEG BacMam vector (Goehring et  
390 al., 2014), with a C-terminal HRV-3C cleavage site followed by EGFP, and a twin StrepII-tag.  
391 An 8x His-tag with a TEV cleavage site was positioned at the N-terminus. Baculovirus was  
392 produced as described previously (Goehring et al., 2014). The P2 baculovirus produced in Sf9  
393 cells was added to HEK293 GnT1<sup>-</sup> cells (mycoplasma test negative, ATCC #CRL-3022) and  
394 grown in suspension in FreeStyle medium (GIBCO-Life Technologies) supplemented with 2%  
395 FBS at 37°C and 8% CO<sub>2</sub>. After 8 hours of transduction 5 mM sodium butyrate was added to  
396 enhance protein expression and allowed the cells to grow for an additional 40 hours at 30°C.

397

398 48 hours post transduction, cells were harvested by centrifugation at 1,500 g for 10 mins and  
399 washed in phosphate-buffered saline (PBS) pH 7.4. The cell pellet was resuspended and cells  
400 were lysed in an ice-cooled microfluidizer in buffer A (PBS buffer pH 7.4, 1 mM Tris(2-  
401 carboxyethyl) phosphine (TCEP), 10% glycerol) in the presence of protease inhibitors (0.2 mM

402 AEBSF, 10  $\mu$ M leupeptin). 50 ml buffer A was used per pellet obtained from 800 ml of HEK293  
403 cell culture. The lysate was centrifuged at 5,000 g for 5 min to remove cell debris, followed by  
404 a 15,000 g centrifugation for 10 mins to remove sub-cellular organelles. The membranes were  
405 collected by ultracentrifugation using a Beckman Coulter Type 70 Ti rotor at 40,000 rpm. The  
406 membranes were then mechanically homogenized in buffer B (100 mM Tris-HCl pH 8, 150  
407 mM NaCl, 1 mM TCEP, 10% glycerol) containing protease inhibitors, flash-frozen and stored  
408 at  $-80^{\circ}\text{C}$  until further purification.

409

#### 410 **Purification of TRPC4 in DDM followed by amphipol exchange**

411 Membranes were solubilized for 2 hr in buffer B supplemented with 1% dodecyl maltoside  
412 (Anatrace #D310). Insoluble material was removed by ultracentrifugation for 1 hr in a Beckman  
413 Coulter Type 70 Ti rotor at 40,000 rpm. The soluble membrane fraction was diluted 2-fold with  
414 buffer B and applied to a column packed with Strep-Tactin beads (IBA Lifesciences) by gravity  
415 flow (6–10 s/drop) at  $4^{\circ}\text{C}$ . Next, the resin was washed with ten column volumes of buffer B  
416 supplemented with 0.04% DDM solution containing protease inhibitors. Bound protein was  
417 eluted seven times with 0.5 column volumes of buffer A with 3 mM D-Desthiobiotin (Sigma-  
418 Aldrich), 0.026% DDM and 0.1 mM AEBSF protease inhibitor. The C-terminal EGFP tag was  
419 removed by incubating the eluted fractions with HRV-3C protease overnight. The next day, the  
420 detergent was replaced with amphipols A8-35 (Anatrace) 4:1 (w/w) to the cleaved protein and  
421 incubating for 6 hr at  $4^{\circ}\text{C}$ . Detergent removal was performed by adding Biobeads SM2  
422 (BioRad) pre-equilibrated in PBS to the protein solution at 10 mg/ml final concentration for 1  
423 hr, then replaced with fresh Biobeads at 10 mg/ml for overnight incubation at  $4^{\circ}\text{C}$ . Biobeads  
424 were removed using a Poly-Prep column (BioRad) and the solution was centrifuged at 20,000  
425 g for 10 min to remove any precipitate. The protein was concentrated with a 100 MWCO  
426 Amicon centrifugal filter unit (Millipore) and purified by size exclusion chromatography using  
427 a Superose 6 Increase 10/300 GL column (GE Healthcare) equilibrated in buffer C (PBS pH  
428 7.4, 1 mM TCEP). The peak corresponding to tetrameric TRPC4<sub>DR</sub> in amphipols was collected  
429 and analysed initially with negative stain EM and then by cryo-EM.

430

#### 431 **TRPC4 pulldown assay using CaM sepharose beads**

432 The assay was performed with manufacturer instructions using TRPC4 as a bait. Briefly, 1 ml  
433 of CaM sepharose beads were loaded into the Biorad Ployprep column and washed with 10 ml  
434 of binding buffer containing 20 mM Tris-HCl (pH 7.5), 150 mM NaCl, 2 mM CaCl<sub>2</sub>. TRPC4  
435 prepared in LMNG (described below) was loaded onto the column by gravity flow (10 s/drop)



436 at 4 °C. After loading, the column was washed with 10 ml of binding buffer. Finally, TRPC4  
437 was eluted with 5ml of elution buffer containing 20 mM Tris-HCl (pH 7.5), 150 mM NaCl, 2  
438 mM EGTA (Figure S9).

439

#### 440 **Purification of CaM**

441 Mouse CaM was subcloned into a pET19 vector and expressed in BL21-CodonPlus (DE3) -  
442 RIPL cells. Cells were grown in LB broth with 125 µg/ml ampicillin at 37 °C until an OD600  
443 of 0.4 was reached. Subsequently, CaM expression was induced with 1 mM IPTG and grown  
444 overnight at 20 °C. Cells were harvested by centrifugation and resuspended in 50 ml (per liter  
445 of culture) of lysis buffer containing 20 mM Tris-HCl (pH 8.0), 150 mM NaCl and 5 mM  
446 imidazole. The cells were lysed in an ice-cooled microfluidizer. The soluble fraction obtained  
447 after centrifugation was loaded onto an 8 ml Talon resin column pre-equilibrated with lysis  
448 buffer. The resin was washed with 100 ml of lysis buffer containing 20 mM Tris-HCl (pH 8.0),  
449 150 mM NaCl and 20 mM imidazole before eluting in 5 x 5 ml fractions using 25 ml of lysis  
450 buffer supplemented with 20 mM Tris-HCl (pH 8.0), 150 mM NaCl and 250 mM imidazole.  
451 Calmodulin was further purified by size exclusion chromatography using a Superose 6 10/300  
452 gel filtration column and stored at -80 °C in a storage buffer consisting of 20 mM Tris-HCl (pH  
453 8.0), 150 mM NaCl, 10 % glycerol.

454

#### 455 **Preparation of the TRPC4-CaM complex**

456 TRPC4 membranes were solubilized for 2 hr in buffer B supplemented with 1% LMNG  
457 (Anatrace #NG310). Then a protocol similar to that used for DDM purification was followed,  
458 except that DDM in buffer B was replaced by LMNG with the addition of 10 µM calmodulin  
459 and 10 mM calcium chloride. The LMNG detergent concentration was maintained at 5 times  
460 the CMC for washing buffer and 3 times CMC for elution. The C-terminal EGFP tag was  
461 removed by incubating the eluted fractions with HRV-3C protease overnight. The complex was  
462 further purified by size exclusion chromatography using a Superose 6 Increase 10/300 GL  
463 column (GE Healthcare) equilibrated in buffer containing 20 mM Tris-HCl (pH 8.0), 150 mM  
464 NaCl, 1 mM TCEP, 10 mM calcium chloride and 5% glycerol. Complex formation was  
465 assessed by running SDS-PAGE of the peak fraction known to contain TRPC4 (Figure S9).  
466 The gel analysis indicated sub-saturation of the complex. Hence, 10 µM CaM was added to  
467 saturate the complex before concentrating it to 0.3 mg/ml for plunging. The preparation of  
468 TRPC4 -apo in LMNG was similar to the TRPC4-CaM complex except that CaM and CaCl<sub>2</sub>  
469 were not added.



470

### 471 **Cryo-EM grid preparation and screening**

472 The sample quality and integrity were evaluated by negative stain electron microscopy prior to  
473 cryo-EM grid preparation and image acquisition as described earlier (Vinayagam et al., 2018).  
474 Typically, 4  $\mu$ l of TRPC4<sub>DR</sub> at a sample concentration of 0.02 mg/ml were applied onto a  
475 freshly glow-discharged copper grid with an additional thin carbon layer. After incubation for  
476 45 s, the sample was blotted with Whatman no. 4 filter paper and stained with 0.75% uranyl  
477 formate. The images were recorded manually with a JEOL JEM-1400 TEM operated at an  
478 acceleration voltage of 120 kV, and a 4k F416 CMOS detector (TVIPS). For cryo-EM the  
479 ligands dissolved in DMSO were added to a final concentration of 100  $\mu$ M (final DMSO  
480 concentration 1%) to TRPC4 exchanged in amphipols and incubated for 30 minutes before  
481 plunging using a Vitrobot cryo-plunger (FEI Thermo Fisher) operated at 4 °C and 100%  
482 humidity. Details of the plunging conditions are summarized in [Table 1](#).

483

### 484 **Cryo-EM data acquisition and image processing**

485 Data sets were collected using EPU software on Titan Krios microscopes (FEI Thermo Fisher)  
486 operated at 300 kV and equipped with an X-FEG. For the dataset of the activator-bound TRPC4  
487 the aberration-free image shift (AFIS) feature of EPU was used to speed up the data-collection  
488 process. Equally dosed frames were collected using a K2 Summit (Gatan) or K3 (Gatan) direct  
489 electron detectors in super-resolution mode in combination with a GIF quantum-energy filter  
490 set to a filter width of 20 eV. The details of all four data sets including pixel size, electron dose,  
491 exposure time, number of frames and defocus range are summarized in [Table 1](#). Data collection  
492 was monitored live using TranSPHIRE (Stabrin, 2020), allowing for direct adjustments of data  
493 acquisition settings when necessary, i.e. defocus range or astigmatism. The total number of  
494 images collected is summarized in [Table 1](#). Preprocessing included drift correction with  
495 MotionCor2 (Zheng et al., 2017b), creating aligned full-dose and dose-weighted micrographs.  
496 The super-resolution images were binned twice after motion correction to speed up further  
497 processing steps. CTF estimation was also performed within TranSPHIRE using CTFFIND  
498 4.1.10 (Rohou and Grigorieff, 2015) on non-dose weighted aligned micrographs. Unaligned  
499 frame averages were manually inspected and removed based on ice and image quality, resulting  
500 in a removal of 5-20 % of the data sets (see [Table 1](#) for details). Following processing steps  
501 were performed using motion-corrected dose weighted sums in the SPHIRE software package  
502 unless otherwise indicated (Moriya et al., 2017).

503 Single particles were picked automatically with crYOLO using the general model  
504 (Wagner et al., 2019). The particles were then windowed to a final box size of  $288 \times 288$  pixels.  
505 Reference-free 2-D classification and cleaning of the data set was performed with the iterative  
506 stable alignment and clustering approach ISAC (Yang et al., 2012) in SPHIRE. ISAC was  
507 performed at a pixel size of  $3.52 \text{ \AA}/\text{pixel}$  for apo-TRPC4 and TRPC4 bound to CaM and the  
508 inhibitor, and with  $3.8 \text{ \AA}/\text{pixel}$  for the TRPC4-activator complex. The ‘Beautify’ tool of  
509 SPHIRE was then applied to obtain refined and sharpened 2-D class averages at the original  
510 pixel size, showing high-resolution features. A subset of particles producing 2-D class averages  
511 and reconstructions with high-resolution features were then selected for further structure  
512 refinement. The previously reported apo structure was used as reference for 3D refinement in  
513 MERIDIEN with imposed  $C_4$  symmetry (Moriya et al., 2017). Further polishing and CTF  
514 refinement were carried out in RELION 3.0.4 (Zivanov et al., 2018).

515  
516 In case of activator bound to TRPC4 bound structure, the refinement did not improve above  $4.1$   
517  $\text{ \AA}$ , as the dataset collected with AFIS suffered from stronger beam tilt which was estimated and  
518 corrected in RELION before 3D classification. For both the ligands, a 3D classification was  
519 performed with  $C_4$  symmetry to classify the subpopulation. The classes having high resolution  
520 features bound with ligands were selected and further polished and CTF-refined in RELION.

521 For TRPC4 bound with CaM, 3D classification using Sort3d in SPHIRE was performed  
522 to identify subpopulations with different complex stoichiometries. To further improve the  
523 resolution of the CaM region, we used symmetry expansion by quadrupling the 227,693  
524 particles to mimic the  $C_4$  symmetry of the tetramer. Thus, the resulting 910,772 particles were  
525 used for Sort3d with a focused mask comprising the four CaM regions without imposing  
526 symmetry. Ten different classes obtained with Sort3d showed different stoichiometries (TRPC4  
527 monomer:CaM) as shown in [Figure S10](#). Four classes showing well resolved helices for CaM  
528 were selected and oriented in the same direction in order to boost the density at single CaM site  
529 ([Figure S10](#)). This rotation was achieved by applying a rotation of  $(\pm 90^\circ, 180^\circ, 270^\circ)$  to the  
530 projection parameters of the classes using a customized script. After rotation, duplicates were  
531 removed, reducing the number of particles to 160,829. These particles were further polished  
532 and CTF-refined in RELION. The polished particles were finally refined in MERIDIEN  
533 (SPHIRE) with  $C_1$  symmetry using a mask encompassing TRPC4 with a single CaM.

534

535 **Local resolution estimation and filtering**

536 The final half-maps were combined using a tight mask with the application of B-factors  
537 automatically determined by the PostRefiner tool in SPHIRE and filtered to the estimated  
538 resolution. The final estimated resolution by the ‘gold standard’ FSC = 0.143 criterion between  
539 the two masked half-maps is given in [Table 2](#). The local resolution was calculated using  
540 `sp_locres` in SPHIRE. In case of TRPC4-CaM, the final densities were filtered according to  
541 local resolution using the local de-noising filter LAFTER (Ramlaul et al., 2019) to recover  
542 features with more signal than noise (based on half-maps).

543

#### 544 **Model building, refinement and validation**

545 The previously reported model of TRPC4 (Vinayagam et al., 2018) was initially docked into  
546 the density and fitted into the map as rigid body using UCSF Chimera. The model was further  
547 adjusted to fit in the density using Coot (Emsley et al., 2010) with an iterative process of real  
548 space refinement in Phenix (Adams et al., 2010) and model adjustment in Coot until a  
549 convergence evaluated by model to map fit with valid geometrical parameters. The high  
550 resolution obtained with the activator and apo structure enabled accurate modelling of the  
551 structure especially in the region encompassing residues 727-731 that connects the rib helix to  
552 the C-terminal helix ([Figure S11](#)). The presence of connecting density at this region shows the  
553 swapping of helix in this region. In our previous model, the density for the corresponding area  
554 was less resolved and the C-terminal helix was modelled without the domain swapping of the  
555 C-terminal helix. For both the activator and inhibitor molecules, cif files were generated using  
556 `eLBOW` tool in Phenix and used as geometrical restrains in Coot and Phenix during modelling  
557 and refinement respectively.

558 In the TRPC4-CaM complex, the C-terminal lobe of CaM bound with myosin light  
559 chain kinase (PDB ID: 2LV6) was used initially for rigid body fitting into the CaM density  
560 using Chimera. Then CaM was flexibly fitted into the density with the `Cryo_fit` tool in Phenix  
561 employing MD simulations. With the guide of this CaM model, the CaM was further adjusted  
562 manually to fit inside the density using Coot. Several rounds of iterative model building and  
563 refinement were performed using Coot and Phenix respectively until a good fit with a valid  
564 geometry was obtained ([Table 2](#)).

565 The densities corresponding to annular lipids were modelled as phosphatidic acid lipid  
566 (PDB ligand ID LPP) in the structures of activator-bound TRPC4 and apo TRPC4. In case of  
567 CaM-bound TRPC4 and inhibitor-bound TRPC4, a shorter lipid tail (PDB ligand ID 44E) was  
568 modelled due to limited resolution.

569 Finally, validation statistics computed by Phenix using MolProbity (Chen et al., 2010)  
570 were used to validate the overall geometry of the model, the model-to-map correlation value to  
571 assess the fitness of the model to its density, and an EMRinger score (Barad et al., 2015) to  
572 validate side chain geometry.

573 Figures were prepared in Chimera (Pettersen et al., 2004). Multiple sequence alignment  
574 was done using Clustal Omega (Sievers et al., 2011). Figures of the sequence alignment were  
575 made in Jalview (Waterhouse et al., 2009). The radius of the TRPC4 pore was determined using  
576 HOLE (Smart et al., 1996).

577

### 578 **Synthesis of GFB-9289**

579

#### 580 **4-chloro-5-(4-cyclohexyl-3-oxopiperazin-1-yl)-2,3-dihydropyridazin-3-one (GFB-9289)**

581 To a solution of 1-cyclohexylpiperazin-2-one (150 mg, 0.8 mmol, 1 equivalent) in DMF (5 mL)  
582 was added 4,5-dichloro-2,3-dihydropyridazin-3-one (410 mg, 2.5 mmol, 3.0 equivalent) and  
583 DIEA ( 442 mg, 3.4 mmol, 4.0 equivalent) at ambient temperature under air atmosphere. The  
584 resulting mixture was stirred for 5 h at 100 °C. Then the reaction mixture was cooled and  
585 purified by reverse phase flash with the following conditions (Column: C18 OBD Column,  
586 5µm, 19x330mm; Mobile Phase A: Water (5 mmol/L NH<sub>4</sub>HCO<sub>3</sub>), Mobile Phase B: ACN; Flow  
587 rate: 45 mL/min; Gradient: 30% B to 60% B in 40 min; 254 nm; Rt: 15min) to afford crude  
588 product (80 mg), which was further purified by Chiral-Prep-HPLC with the following  
589 conditions: Column: CHIRALPAK IG-3, Column size :0.46x5cm;3µm; Mobile phase:  
590 Hex(0.1%DEA):EtOH=80:20; Pressure: MPA; Flow: 1.0ml/min; Instrument: LC-08; Detector:  
591 254nm; Temperature: 25 °C. 4-chloro-5-(4-cyclohexyl-3-oxopiperazin-1-yl)-2,3-  
592 dihydropyridazin-3-one (26.5 mg, 10.4%) was obtained at 1.436 min as a white solid (26.5 mg).  
593 <sup>1</sup>H NMR (400 MHz, DMSO-*d*<sub>6</sub>) chemical shifts δ 12.91 (s, 1H), 7.86 (s, 1H), 4.23 (t, *J* = 12.1  
594 Hz, 1H), 4.09 (s, 2H), 3.68 (t, *J* = 5.2 Hz, 2H), 3.38 (t, *J* = 5.3 Hz, 2H), 1.77 (d, *J* = 12.8 Hz,  
595 2H), 1.61 (d, *J* = 15.6 Hz, 2H), 1.58 ~C 1.40 (m, 3H), 1.31 (q, *J* = 13.1 Hz, 2H), 1.11 (t, *J* =  
596 13.1 Hz, 1H). LRMS (ESI) *m/z*: [M+H]<sup>+</sup> calculated for C<sub>14</sub>H<sub>20</sub>ClN<sub>4</sub>O<sub>2</sub> 311.13; found 311.15.  
597 Purity 96%.

598

### 599 **Cellular Ca<sup>2+</sup> uptake assay**

600 Two 96-well plates of HEK293T cells had wells individually seeded at a density of 0.01 x 10<sup>6</sup>  
601 cells in 200 µL DMEM/F12 + 10% FBS media per well, and were then grown in a 37 °C  
602 incubator with a 5% CO<sub>2</sub> atmosphere. After 24 h, each well of one plate was

603 individually transfected with the TRPC4<sub>DR</sub> plasmid using Lipofectamine (Thermo Fisher  
604 Scientific). The other plate was left untransfected and used as a control. After 24 h, the  
605 transfection efficiency was confirmed by monitoring fluorescence of the EGFP fused to  
606 TRPC4<sub>DR</sub> using an EVOS FL microscope (Thermo Fisher Scientific).

607 A 1 mM working solution of rhod-2 AM ester was prepared by mixing 25  $\mu$ L DMSO + 25  $\mu$ L  
608 of 20% Pluronic F-127 per 50  $\mu$ g rhod-2 AM ester. 50  $\mu$ L of rhod-2 AM ester loading buffer  
609 (10  $\mu$ M rhod-2 AM ester in working solution, 10 mM HEPES pH 7.4, 130 mM NaCl, 5 mM  
610 KCl, 8 mM glucose, 1.2 mM MgCl<sub>2</sub>, 1.5 mM CaCl<sub>2</sub>, 0.05% Pluronic F-127) was then added to  
611 each well and incubated for 1.5 h at 37 °C. The media-loading buffer mix was thoroughly  
612 removed and 50  $\mu$ L recording buffer (10 mM HEPES pH 7.4, 130 mM NaCl, 5 mM KCl, 8  
613 mM glucose, 1.2 mM MgCl<sub>2</sub>, 1.5 mM CaCl<sub>2</sub>, 0.05% Pluronic F-127) was added per well. Rhod-  
614 2 fluorescence of the cells was recorded using a Spark multimode microplate reader (Tecan)  
615 prior to each experiment. Rhod-2 uptake efficiency was assumed to be similar across all wells,  
616 and these values were used as a proxy for the number of cells per well, a parameter that was  
617 utilized later during data processing.

618 The following conditions were tested in order to determine the effect of agonists and antagonists  
619 on Ca<sup>2+</sup> influx into TRPC4<sub>DR</sub>- and non-transfected cells: nothing added (additional negative  
620 control), + 0.28% DMSO (negative control), + 112 nM Englerin A (positive control), + 112 nM  
621 Englerin A / 16800 nM GFB-8438, + 10630 nM GFB-9289, + 10630 nM GFB-9289 / 16800  
622 nM GFB-8438. 16 wells containing biological replicates were used per condition tested per  
623 plate. Except for the condition where no extra components were added, compounds at 2x final  
624 concentration in a total of 50  $\mu$ L recording buffer were added per well. In conditions where the  
625 antagonist GFB-8438 was used, the cells were pre-incubated for 5 min with 25  $\mu$ L GFB-8438  
626 at 4x final concentration before adding 25  $\mu$ L of Englerin A or GFB-9289 at 4x final  
627 concentration and initiating recording. Recording of rhod-2 fluorescence increase (indicative  
628 of Ca<sup>2+</sup> influx into cells) immediately after addition of each condition's final component was  
629 performed on a Spark multimode microplate reader (Tecan) at an excitation wavelength of 550  
630 nm and an emission wavelength of 581 nm. Recording occurred for 1 minute over 10 cycles  
631 with 6 seconds per cycle.

632 During data analysis, the rhod-2 fluorescence signal of cycle 1 was subtracted for every well in  
633 order to obtain a baseline value. Normalization coefficients for cell numbers were calculated  
634 based on the rhod-2 fluorescence measured prior to compound addition and applied to the  
635 analyzed data, allowing the results of the assay to be compared between the biological  
636 replicates. Biological replicates that were subject to handling and technical errors during the

637 measurement were considered outliers and excluded. The resulting data was plotted, which  
638 utilized the following number of biological replicates (TRPC4-transfected / non-transfected  
639 cells): 15/16 for nothing added, 11/12 for + DMSO, 10/14 for + Englerin A, 12/15 for +  
640 Englerin A / GFB-8438, 10/12 for + GFB-9289, 13/12 for + GFB-9289 / GFB-8438.

641

642

643

644

645

646

647

648

649

650

651

652

653

654

655

656

657

658

659

660

661

662

663

664

665

666

667

668



669 **Table 1. Plunging and imaging conditions used for cryo-EM analysis of TRPC4 bound**  
 670 **with ligands**

671

672 1.1 Plunging conditions

673

674

| Sample          | Grid type      | Volume    | Concentration | Blotting time | Blotting force |
|-----------------|----------------|-----------|---------------|---------------|----------------|
| TRPC4-8438      | C-Flat 2/1     | 3 $\mu$ l | 0.3 mg/ml     | 3 s           | -10            |
| TRPC4-9289      | C-Flat 1.2/1.3 | 3 $\mu$ l | 0.35 mg/ml    | 3 s           | 0              |
| TRPC4-CaM       | QF 2/1         | 3 $\mu$ l | 0.3 mg/ml     | 3 s           | 0              |
| TRPC4-apo(LMNG) | C-Flat 1.2/1.3 | 3 $\mu$ l | 0.4 mg/ml     | 3 s           | -3             |

675

676 1.2 Imaging Conditions

677

| Microscopy                               | TRPC4-apo                         | TRPC4-CaM      | TRPC4-GFB9289<br>(activator)   | TRPC4-GFB8438<br>(inhibitor) |
|------------------------------------------|-----------------------------------|----------------|--------------------------------|------------------------------|
| Microscope                               | Titan Krios (X-FEG, Cs-corrected) |                | Titan Krios (X-FEG, Cs 2.7 mm) |                              |
| Voltage [kV]                             | 300                               |                | 300                            |                              |
| Defocus range [ $\mu$ m]                 | 0.65 to 3.02                      | 0.38 to 3.48   | 0.68 to 3.64                   | 0.35 to 3.52                 |
| Camera                                   | K2 counting                       | K2 counting    | K3 Super resolution            | K3 Super resolution          |
| Pixel size [ $\text{\AA}$ ]              | 0.85                              | 0.85           | 0.455 /0.91 <sup>a</sup>       | 0.455/0.91 <sup>a</sup>      |
| Total electron dose [ $e/\text{\AA}^2$ ] | 88.7                              | 88.2           | 65.45                          | 66.58                        |
| Exposure time [s]                        | 10                                | 10             | 3                              | 3                            |
| Frames per movie                         | 50                                | 80             | 60                             | 60                           |
| Number of images                         | 2755<br>(3079)                    | 6937<br>(7972) | 2369<br>(2970)                 | 4444<br>(4676)               |

<sup>a</sup> Pixel size after 2x binning used for processing

In parenthesis is the initial number of images.

**Table 2. Refinement and model validation statistics**

Refinement statistics

|                                                                            | TRPC4-apo          | TRPC4-CaM          | TRPC4-GFB9289<br>(activator) | TRPC4-GFB8438<br>(inhibitor) |
|----------------------------------------------------------------------------|--------------------|--------------------|------------------------------|------------------------------|
| Number of particles used in refinement                                     | 126873             | 160829             | 65811                        | 42524                        |
| Final resolution [Å]                                                       | 2.8                | 3.6                | 3.2                          | 3.6                          |
| Map sharpening factor [Å <sup>2</sup> ]                                    | -57.97             | -72.37             | -100                         | -61.35                       |
| Electron dose particles final refinement [e <sup>-</sup> /Å <sup>2</sup> ] | Polished particles | Polished particles | Polished particles           | Polished                     |

Model geometry and validation statistics

|                           |       |       |       |       |
|---------------------------|-------|-------|-------|-------|
| Atomic model composition  |       |       |       |       |
| Non-hydrogen atoms        | 22124 | 21650 | 21152 | 21080 |
| Refinement (Phenix)       |       |       |       |       |
| RMSD bond                 | 0.008 | 0.011 | 0.008 | 0.007 |
| RMSD angle                | 0.738 | 0.983 | 0.645 | 0.771 |
| Model to map fit, CC mask | 0.84  | 0.86  | 0.85  | 0.86  |
| Validation                |       |       |       |       |
| Ramachandran plot (%)     |       |       |       |       |
| outliers                  | 0.0   | 0.04  | 0.0   | 0.0   |
| allowed                   | 7.44  | 9.91  | 7.15  | 5.72  |
| favoured                  | 92.56 | 90.05 | 92.85 | 94.28 |
| Rotamer outliers (%)      | 0.51  | 0.09  | 8.99  | 0.35  |
| Molprobrity score         | 1.82  | 2.29  | 2.38  | 1.84  |
| EMRinger score            | 3.04  | 1.61  | 2.67  | 2.28  |

679

680

## 681 **Acknowledgements**

682 We are thankful to Nina Ludwigs, Marion Hülseweh and Nathalie Bleimling for technical  
683 assistance. We also thank Ingrid Vetter and Sabrina Pospich for helpful discussion with model  
684 building and analysis and Amrita Rai for the assay development. We are grateful to Matthew  
685 Daniels for assistance with compound comparison and selection. This work was supported by  
686 funds from the Max Planck Society (to S.R.).

687

## 688 **Data availability**

689 The atomic coordinates and cryo-EM maps for TRPC4<sub>DR</sub> in complex with XXX, XXX are  
690 available at the Protein Data Bank (PDB)/Electron Microscopy Data Bank (EMDB) databases.  
691 The accession numbers are XXXX/EMD-XXXX. The data sets generated in the current study  
692 are available from the corresponding author on reasonable request.

693

## 694 **Author Contributions**

695 S.R. and G.M. designed the project. D.V. expressed and purified TRPC4. O.H. recorded the  
696 EM images. D.V. prepared cryo-EM specimens, D.V. and F.M. and M.S. processed cryo-EM  
697 data, and D.V. built the atomic models. O.S. performed the Ca<sup>2+</sup> uptake experiments. M.Y. and  
698 M.W.L. designed and executed compound synthesis. G.M. implemented QC assay data. D.V.,  
699 O.S. and D.Q. prepared figures and movies. D.V., D.Q. and S.R. wrote the manuscript. All  
700 authors reviewed the results and edited the manuscript.

701

702

## 703 **Competing interests**

704 The authors declare no competing interests. M.Y., M.W.L, and G.M. are or were shareholders  
705 of Goldfinch Bio.

706

707

708

709

710

711

## 712 References

- 713 Adams, P.D., Afonine, P.V., Bunkóczi, G., Chen, V.B., Davis, I.W., Echols, N., Headd, J.J.,  
714 Hung, L.-W., Kapral, G.J., Grosse-Kunstleve, R.W., et al. (2010). PHENIX: a comprehensive  
715 Python-based system for macromolecular structure solution. *Acta Crystallogr. D Biol.*  
716 *Crystallogr.* *66*, 213–221.
- 717 Akbulut, Y., Gaunt, H.J., Muraki, K., Ludlow, M.J., Amer, M.S., Bruns, A., Vasudev, N.S.,  
718 Radtke, L., Willot, M., Hahn, S., et al. (2015). (–)-Englerin A is a Potent and Selective  
719 Activator of TRPC4 and TRPC5 Calcium Channels. *Angew. Chem. Int. Ed.* *54*, 3787–3791.
- 720 Autzen, H.E., Myasnikov, A.G., Campbell, M.G., Asarnow, D., Julius, D., and Cheng, Y.  
721 (2018). Structure of the human TRPM4 ion channel in a lipid nanodisc. *Science* *359*, 228–  
722 232.
- 723 Bai, Y., Yu, X., Chen, H., Horne, D., White, R., Wu, X., Lee, P., Gu, Y., Ghimire-Rijal, S.,  
724 Lin, D.C.-H., et al. (2020). Structural basis for pharmacological modulation of the TRPC6  
725 channel. *Elife* *9*, 352.
- 726 Barad, B.A., Echols, N., Wang, R.Y.-R., Cheng, Y., DiMaio, F., Adams, P.D., and Fraser, J.S.  
727 (2015). EMRinger: side chain-directed model and map validation for 3D cryo-electron  
728 microscopy. *Nat. Methods* *12*, 943–946.
- 729 Beckmann, H., Richter, J., Hill, K., Urban, N., Lemoine, H., and Schaefer, M. (2017). A  
730 benzothiadiazine derivative and methylprednisolone are novel and selective activators of  
731 transient receptor potential canonical 5 (TRPC5) channels. *Cell Calcium* *66*, 10–18.
- 732 Berridge, M., and Berridge, M. (2004). Conformational Coupling: A Physiological Calcium  
733 Entry Mechanism. *Science Signaling* *2004*, pe33–pe33.
- 734 Bröker Lai, J., Lai, J.B., Kollwe, A., Schindeldecker, B., Pohle, J., Chi, V.N., Nguyen Chi,  
735 V., Mathar, I., Guzman, R., Schwarz, Y., et al. (2017). Heteromeric channels formed by  
736 TRPC1, TRPC4 and TRPC5 define hippocampal synaptic transmission and working memory.  
737 *Embo J* *36*, 2770–2789.
- 738 Carson, C., Raman, P., Tullai, J., Xu, L., Henault, M., Thomas, E., Yeola, S., Lao, J., McPate,  
739 M., Verkuyl, J.M., et al. (2015). Englerin A Agonizes the TRPC4/C5 Cation Channels to  
740 Inhibit Tumor Cell Line Proliferation. *PLoS ONE* *10*, e0127498–.
- 741 Chen, V.B., Arendall, W.B., Headd, J.J., Keedy, D.A., Immormino, R.M., Kapral, G.J.,  
742 Murray, L.W., Richardson, J.S., and Richardson, D.C. (2010). MolProbity: all-atom structure  
743 validation for macromolecular crystallography. *Acta Crystallogr. D Biol. Crystallogr.* *66*, 12–  
744 21.
- 745 Clapham, D.E. (2003). TRP channels as cellular sensors. *Nature* *426*, 517–524.
- 746 Diver, M.M., Cheng, Y., and Julius, D. (2019). Structural insights into TRPM8 inhibition and  
747 desensitization. *Science* *365*, 1434–1440.
- 748 Duan, J., Li, J., Zeng, B., Chen, G.-L., Peng, X., Zhang, Y., Wang, J., Clapham, D.E., Li, Z.,  
749 and Zhang, J. (2018). Structure of the mouse TRPC4 ion channel. *Nat Commun* *9*, 517–10.

- 750 Emsley, P., Lohkamp, B., Scott, W.G., and Cowtan, K. (2010). Features and development of  
751 Coot. *Acta Crystallogr. D Biol. Crystallogr.* *66*, 486–501.
- 752 Freichel, M., Tsvilovskyy, V., and Camacho-Londoño, J.E. (2014). TRPC4- and TRPC4-  
753 containing channels. *Handb Exp Pharmacol* *222*, 85–128.
- 754 Goehring, A., Lee, C.-H., Wang, K.H., Michel, J.C., Claxton, D.P., Bacongus, I., Althoff, T.,  
755 Fischer, S., Garcia, K.C., and Gouaux, E. (2014). Screening and large-scale expression of  
756 membrane proteins in mammalian cells for structural studies. *Nat Protoc* *9*, 2574–2585.
- 757 Hall, G., Wang, L., and Spurney, R.F. (2019). TRPC Channels in Proteinuric Kidney  
758 Diseases. *Cells* *9*, 44.
- 759 Hammes, G.G., Chang, Y.-C., and Oas, T.G. (2009). Conformational selection or induced fit:  
760 a flux description of reaction mechanism. *Proc. Natl. Acad. Sci. U.S.A.* *106*, 13737–13741.
- 761 Hofmann, T., Obukhov, A.G., Schaefer, M., Harteneck, C., Gudermann, T., and Schultz, G.  
762 (1999). Direct activation of human TRPC6 and TRPC3 channels by diacylglycerol. *Nature*  
763 *397*, 259–263.
- 764 Hughes, T.E.T., Pumroy, R.A., Yazici, A.T., Kasimova, M.A., Fluck, E.C., Huynh, K.W.,  
765 Samanta, A., Molugu, S.K., Zhou, Z.H., Carnevale, V., et al. (2018). Structural insights on  
766 TRPV5 gating by endogenous modulators. *Nat Commun* *9*, 4198–11.
- 767 Jeon, J.-P., Hong, C., Park, E.J., Jeon, J.-H., Cho, N.-H., Kim, I.-G., Choe, H., Muallem, S.,  
768 Kim, H.J., and So, I. (2012). Selective  $G\alpha_i$  Subunits as Novel Direct Activators of Transient  
769 Receptor Potential Canonical (TRPC)4 and TRPC5 Channels. *J. Biol. Chem.* *287*, 17029–  
770 17039.
- 771 Jung, S., Mühle, A., Schaefer, M., Strotmann, R., Schultz, G., and Plant, T.D. (2003).  
772 Lanthanides potentiate TRPC5 currents by an action at extracellular sites close to the pore  
773 mouth. *J. Biol. Chem.* *278*, 3562–3571.
- 774 Just, S., Chenard, B.L., Ceci, A., Strassmaier, T., Chong, J.A., Blair, N.T., Gallaschun, R.J.,  
775 del Camino, D., Cantin, S., D'Amours, M., et al. (2018). Treatment with HC-070, a potent  
776 inhibitor of TRPC4 and TRPC5, leads to anxiolytic and antidepressant effects in mice. *PLoS*  
777 *ONE* *13*, e0191225.
- 778 Kanki, H., Kanki, H., Kinoshita, M., Kinoshita, M., Akaike, A., Akaike, A., Satoh, M., Satoh,  
779 M., Mori, Y., Mori, Y., et al. (2001). Activation of Inositol 1,4,5-Trisphosphate Receptor Is  
780 Essential for the Opening of Mouse TRP5 Channels. *Mol Pharmacol* *60*, 989–998.
- 781 Kochukov, M.Y., Balasubramanian, A., Noel, R.C., and Marrelli, S.P. (2012). Role of TRPC1  
782 and TRPC3 Channels in Contraction and Relaxation of Mouse Thoracic Aorta. *J Vasc Res* *50*,  
783 11–20.
- 784 Le Bon, C., Marconnet, A., Masscheleyn, S., Popot, J.-L., and Zoonens, M. (2018). Folding  
785 and stabilizing membrane proteins in amphipol A8-35. *Methods* *147*, 95–105.
- 786 Lee, K.P., Yuan, J.P., So, I., Worley, P.F., and Muallem, S. (2010). STIM1-dependent and  
787 STIM1-independent Function of Transient Receptor Potential Canonical (TRPC) Channels  
788 Tunes Their Store-operated Mode. *J. Biol. Chem.* *285*, 38666–38673.

- 789 Mery, L., Magnino, F., Schmidt, K., Krause, K.-H., and Dufour, J.-F. (2001). Alternative  
790 splice variants of hTrp4 differentially interact with the C-terminal portion of the inositol  
791 1,4,5-trisphosphate receptors. *FEBS Lett.* *487*, 377–383.
- 792 Mieke, S., Bieberstein, A., Arnould, I., Ihdene, O., Rütten, H., and Strübing, C. (2010). The  
793 Phospholipid-binding Protein SESTD1 Is a Novel Regulator of the Transient Receptor  
794 Potential Channels TRPC4 and TRPC5. *J. Biol. Chem.* *285*, 12426–12434.
- 795 Minard, A., Bauer, C.C., Bauer, C., Wright, D., Wright, D.J., Rubaiy, H.N., Rubaiy, H.,  
796 Muraki, K., Beech, D., Beech, D.J., et al. (2018). Remarkable Progress with Small-Molecule  
797 Modulation of TRPC1/4/5 Channels: Implications for Understanding the Channels in Health  
798 and Disease. *Cells* *7*, 52.
- 799 Moriya, T., Saur, M., Stabrin, M., Merino, F., Voicu, H., Huang, Z., Penczek, P.A., Raunser,  
800 S., and Gatsogiannis, C. (2017). High-resolution Single Particle Analysis from Electron Cryo-  
801 microscopy Images Using SPHIRE. *J Vis Exp*.
- 802 MUNDEL, P., Westerling-Bui, A., Ledebuer, M., Gal, M.C.-L., Coeffet-Le Gal, M., Pan-  
803 Zhou, X.R., Yu, M., Daniels, M., Plato, C., Harmange, J.C., et al. (2019). SUN-190 GFB-887,  
804 a small molecule inhibitor of TRPC5, protects against podocyte injury and attenuates  
805 proteinuria in models of FSGS. *Kidney International Reports* *4*, S237.
- 806 Owsianik, G., Talavera, K., Voets, T., and Nilius, B. (2006). PERMEATION AND  
807 SELECTIVITY OF TRP CHANNELS. *Annu. Rev. Physiol.* *68*, 685–717.
- 808 Pettersen, E.F., Goddard, T.D., Huang, C.C., Couch, G.S., Greenblatt, D.M., Meng, E.C., and  
809 Ferrin, T.E. (2004). UCSF Chimera--a visualization system for exploratory research and  
810 analysis. *J Comput Chem* *25*, 1605–1612.
- 811 Phelan, K.D., Shwe, U.T., Abramowitz, J., Wu, H., Rhee, S.W., Howell, M.D., Gottschall,  
812 P.E., Freichel, M., Flockerzi, V., Birnbaumer, L., et al. (2013). Canonical Transient Receptor  
813 Channel 5 (TRPC5) and TRPC1/4 Contribute to Seizure and Excitotoxicity by Distinct  
814 Cellular Mechanisms. *Mol Pharmacol* *83*, 429–438.
- 815 Plant, T.D., and Schaefer, M. (2003). TRPC4 and TRPC5: receptor-operated Ca<sup>2+</sup>-permeable  
816 nonselective cation channels. *Cell Calcium* *33*, 441–450.
- 817 Ramlaul, K., Palmer, C.M., and Aylett, C.H.S. (2019). A Local Agreement Filtering  
818 Algorithm for Transmission EM Reconstructions. *J. Struct. Biol.* *205*, 30–40.
- 819 Riccio, A., Li, Y., Moon, J., Kim, K.-S., Smith, K.S., Rudolph, U., Gapon, S., Yao, G.L.,  
820 Tsvetkov, E., Rodig, S.J., et al. (2009). Essential Role for TRPC5 in Amygdala Function and  
821 Fear-Related Behavior. *Cell* *137*, 761–772.
- 822 Richter, J.M., Schaefer, M., and Hill, K. (2013). Riluzole activates TRPC5 channels  
823 independently of PLC activity. *Br J Pharmacol* *171*, 158–170.
- 824 Rohou, A., and Grigorieff, N. (2015). CTFFIND4: Fast and accurate defocus estimation from  
825 electron micrographs. *J. Struct. Biol.* *192*, 216–221.
- 826 Rosado, J.A., Diez, R., Smani, T., and Jardín, I. (2015). STIM and Orai1 Variants in Store-  
827 Operated Calcium Entry. *Front Pharmacol* *6*, 325.



- 828 Rubaiy, H.N., Ludlow, M.J., Henrot, M., Gaunt, H.J., Miteva, K., Cheung, S.Y., Tanahashi,  
829 Y., Hamzah, N., Musialowski, K.E., Blythe, N.M., et al. (2017). Picomolar, selective, and  
830 subtype-specific small-molecule inhibition of TRPC1/4/5 channels. *J. Biol. Chem.* *292*, 8158–  
831 8173.
- 832 Rubaiy, H.N., Seitz, T., Hahn, S., Choidas, A., Habenberger, P., Klebl, B., Dinkel, K.,  
833 Nussbaumer, P., Waldmann, H., Christmann, M., et al. (2018). Identification of an (–)-  
834 englerin A analogue, which antagonizes (–)-englerin A at TRPC1/4/5 channels. *Br J*  
835 *Pharmacol* *175*, 830–839.
- 836 Schaefer, M., Plant, T.D., Obukhov, A.G., Hofmann, T., Gudermann, T., and Schultz, G.  
837 (2000). Receptor-mediated regulation of the nonselective cation channels TRPC4 and TRPC5.  
838 *J. Biol. Chem.* *275*, 17517–17526.
- 839 Selvaraj, S., Sun, Y., and Singh, B. (2010). TRPC Channels and their Implications for  
840 Neurological Diseases. *Cnsnddt* *9*, 94–104.
- 841 Sievers, F., Wilm, A., Dineen, D., Gibson, T.J., Karplus, K., Li, W., Lopez, R., McWilliam,  
842 H., Remmert, M., Söding, J., et al. (2011). Fast, scalable generation of high-quality protein  
843 multiple sequence alignments using Clustal Omega. *Mol. Syst. Biol.* *7*, 539–539.
- 844 Singh, A.K., McGoldrick, L.L., Twomey, E.C., and Sobolevsky, A.I. (2018). Mechanism of  
845 calmodulin inactivation of the calcium-selective TRP channel TRPV6. *Sci Adv* *4*, eaau6088.
- 846 Smart, O.S., Neduelil, J.G., Wang, X., Wallace, B.A., and Sansom, M.S. (1996). HOLE: a  
847 program for the analysis of the pore dimensions of ion channel structural models. *J Mol*  
848 *Graph* *14*, 354–60–376.
- 849 Stabrin, M. (2020). TranSPHIRE: Automated and feedback-optimized on-the-fly processing  
850 for cryo-EM. *bioRxiv* 2020.06.16.155275.
- 851 Tang, J., Lin, Y., Zhang, Z., Tikunova, S., Birnbaumer, L., and Zhu, M.X. (2001).  
852 Identification of common binding sites for calmodulin and inositol 1,4,5-trisphosphate  
853 receptors on the carboxyl termini of trp channels. *J. Biol. Chem.* *276*, 21303–21310.
- 854 Tang, Q., Guo, W., Zheng, L., Wu, J.-X., Liu, M., Zhou, X., Zhang, X., and Chen, L. (2018).  
855 Structure of the receptor-activated human TRPC6 and TRPC3 ion channels. *Cell Res* *28*,  
856 746–755.
- 857 Villalobo, A., Ishida, H., Vogel, H.J., and Berchtold, M.W. (2018). Calmodulin as a protein  
858 linker and a regulator of adaptor/scaffold proteins. *Biochim Biophys Acta Mol Cell Res* *1865*,  
859 507–521.
- 860 Vinayagam, D., Mager, T., Apelbaum, A., Bothe, A., Merino, F., Hofnagel, O., Gatsogiannis,  
861 C., and Raunser, S. (2018). Electron cryo-microscopy structure of the canonical TRPC4 ion  
862 channel. *Elife* *7*, 213.
- 863 Wagner, T., Merino, F., Stabrin, M., Moriya, T., Antoni, C., Apelbaum, A., Hagel, P., Sitsel,  
864 O., Raisch, T., Prumbaum, D., et al. (2019). SPHIRE-crYOLO is a fast and accurate fully  
865 automated particle picker for cryo-EM. *Commun Biol* *2*, 218–13.
- 866 Wang, X., Wang, X.X., Pluznick, J.L., Pluznick, J.L., Wei, P.L., Wei, P., Padanilam, B.J.,  
867 Padanilam, B.J., Sansom, S.C., and Sansom, S.C. (2004). TRPC4 forms store-operated Ca

- 868 2+channels in mouse mesangial cells. *American Journal of Physiology-Cell Physiology* 287,  
869 C357–C364.
- 870 Warnat, J., Philipp, S., Zimmer, S., Flockerzi, V., and Cavalié, A. (1999). Phenotype of a  
871 recombinant store-operated channel: highly selective permeation of Ca<sup>2+</sup>. *The Journal of*  
872 *Physiology* 518 (Pt 3), 631–638.
- 873 Waterhouse, A.M., Procter, J.B., Martin, D.M.A., Clamp, M., and Barton, G.J. (2009).  
874 Jalview Version 2--a multiple sequence alignment editor and analysis workbench.  
875 *Bioinformatics* 25, 1189–1191.
- 876 Wu, D., Huang, W., Richardson, P.M., Priestley, J.V., and Liu, M. (2007). TRPC4 in Rat  
877 Dorsal Root Ganglion Neurons Is Increased after Nerve Injury and Is Necessary for Neurite  
878 Outgrowth. *J. Biol. Chem.* 283, 416–426.
- 879 Wu, X., Wu, X., Eder, P., Eder, P., Chang, B., Chang, B., Molkentin, J.D., and Molkentin,  
880 J.D. (2010). TRPC channels are necessary mediators of pathologic cardiac hypertrophy.  
881 *Proceedings of the National Academy of Sciences* 107, 7000–7005.
- 882 Wulff, H., Christophersen, P., Colussi, P., Chandy, K.G., and Yarov-Yarovoy, V. (2019).  
883 Antibodies and venom peptides: new modalities for ion channels. *Nat Rev Drug Discov* 18,  
884 339–357.
- 885 Yang, L.-P., Jiang, F.-J., Wu, G.-S., Deng, K., Wen, M., Zhou, X., Hong, X., Zhu, M.X., and  
886 Luo, H.-R. (2015). Acute Treatment with a Novel TRPC4/C5 Channel Inhibitor Produces  
887 Antidepressant and Anxiolytic-Like Effects in Mice. *PLoS ONE* 10, e0136255.
- 888 Yang, Z., Fang, J., Chittuluru, J., Asturias, F.J., and Penczek, P.A. (2012). Iterative Stable  
889 Alignment and Clustering of 2D Transmission Electron Microscope Images. *Structure* 20,  
890 237–247.
- 891 Yin, Y., Wu, M., Zubcevic, L., Borschel, W.F., Lander, G.C., and Lee, S.-Y. (2018).  
892 Structure of the cold- and menthol-sensing ion channel TRPM8. *Science* 359, 237–241.
- 893 Yu, M., Ledebor, M.W., Daniels, M., Malojcic, G., Tibbitts, T.T., Coeffet-Le Gal, M., Pan-  
894 Zhou, X.-R., Westerling-Bui, A., Beconi, M., Reilly, J.F., et al. (2019). Discovery of a Potent  
895 and Selective TRPC5 Inhibitor, Efficacious in a Focal Segmental Glomerulosclerosis Model.  
896 *ACS Med Chem Lett* 10, 1579–1585.
- 897 Zeng, W., Yuan, J.P., Kim, M.S., Choi, Y.J., Huang, G.N., Worley, P.F., and Muallem, S.  
898 (2008). STIM1 gates TRPC channels, but not Orai1, by electrostatic interaction. *Mol. Cell* 32,  
899 439–448.
- 900 Zheng, H., Cooper, D.R., Porebski, P.J., Shabalin, I.G., Handing, K.B., and Minor, W.  
901 (2017a). CheckMyMetal: a macromolecular metal-binding validation tool. *Acta Crystallogr D*  
902 *Struct Biol* 73, 223–233.
- 903 Zheng, S.Q., Palovcak, E., Armache, J.-P., Verba, K.A., Cheng, Y., and Agard, D.A. (2017b).  
904 MotionCor2: anisotropic correction of beam-induced motion for improved cryo-electron  
905 microscopy. *Nat. Methods* 14, 331–332.

906 Zhou, Y., Castonguay, P., Sidhom, E.-H., Clark, A.R., Dvela-Levitt, M., Kim, S., Sieber, J.,  
907 Wieder, N., Jung, J.Y., Andreeva, S., et al. (2017). A small-molecule inhibitor of TRPC5 ion  
908 channels suppresses progressive kidney disease in animal models. *Science* 358, 1332–1336.

909 Zhu, M.X. (2005). Multiple roles of calmodulin and other Ca<sup>2+</sup>-binding proteins in the  
910 functional regulation of TRP channels. *Pflugers Arch.* 451, 105–115.

911 Zivanov, J., Nakane, T., Forsberg, B.O., Kimanius, D., Hagen, W.J., Lindahl, E., and Scheres,  
912 S.H. (2018). New tools for automated high-resolution cryo-EM structure determination in  
913 RELION-3. *Elife* 7, 163.

914

915

916

917

918

919

920

921

922

923

924

925

926

927

928

929

930 **Figures**  
931

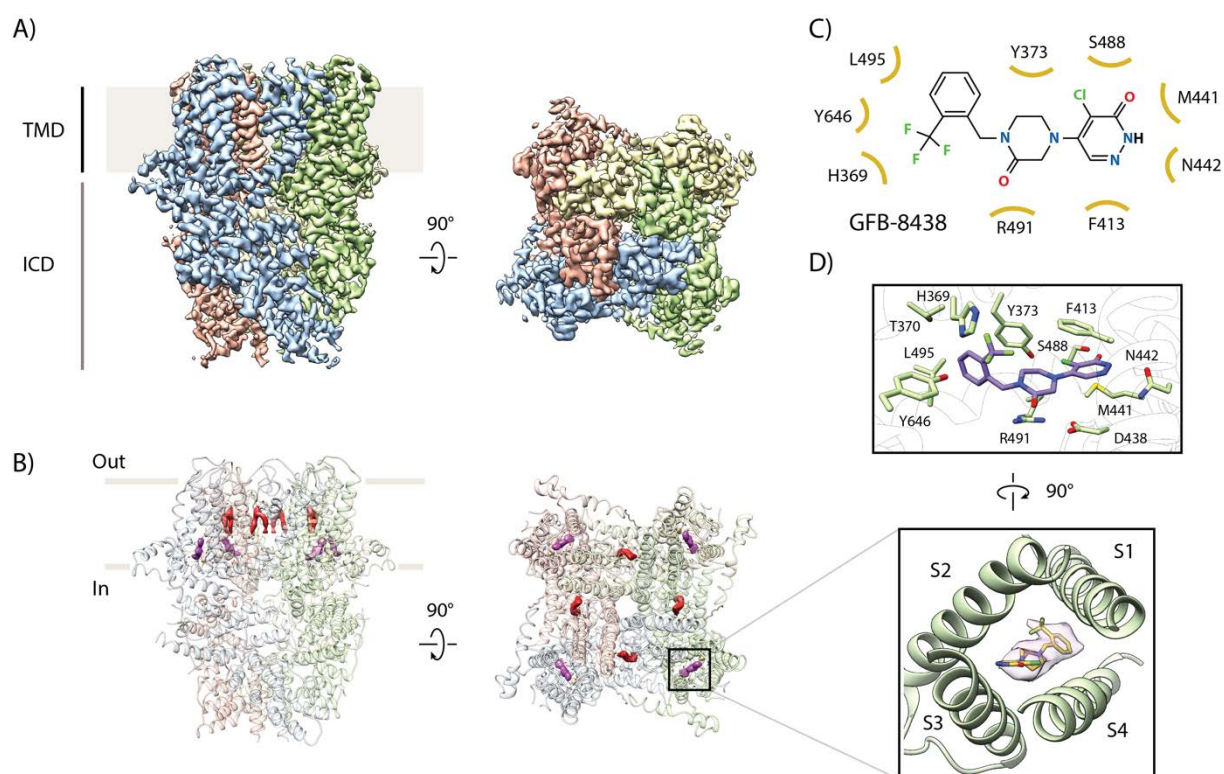

932

933

934 **Figure 1. Cryo-EM structure of inhibitor-bound TRPC4 channel.**

935 (A) Side and top view of the cryo-EM map of GFB-8438 inhibitor-bound TRPC4, with each  
936 subunit colored differently. Positions of the transmembrane domain (TMD) and intracellular  
937 cytosolic domain (ICD) are indicated.

938 (B) Location of non-protein densities relative to the atomic model of TRPC4, which is shown  
939 in transparent ribbon representation in the side- and top view. Densities corresponding to lipids  
940 are depicted in red, GFB-8438 density is shown in purple.

941 (C) Chemical structure of the TRPC4 inhibitor GFB-8438, with important and interacting  
942 residues of TRPC4 highlighted. Non-carbon atoms are colored according to element, with  
943 halogens in green, nitrogen in blue and oxygen in red.

944 (D) Close-up of ligand binding pocket (bottom panel), showing the density corresponding to  
945 the inhibitor GFB-8438 in pink with the ligand structure modelled inside. GFB-8438 is enclosed  
946 by the four helices S1 to S4, constituting the VSL domain. A rotated view of the ligand binding  
947 pocket is shown in the top panel with important and interacting residues highlighted. GFB-8438  
948 is shown in purple.

949

950

951

952

953

954

955

956

957

958

959

960

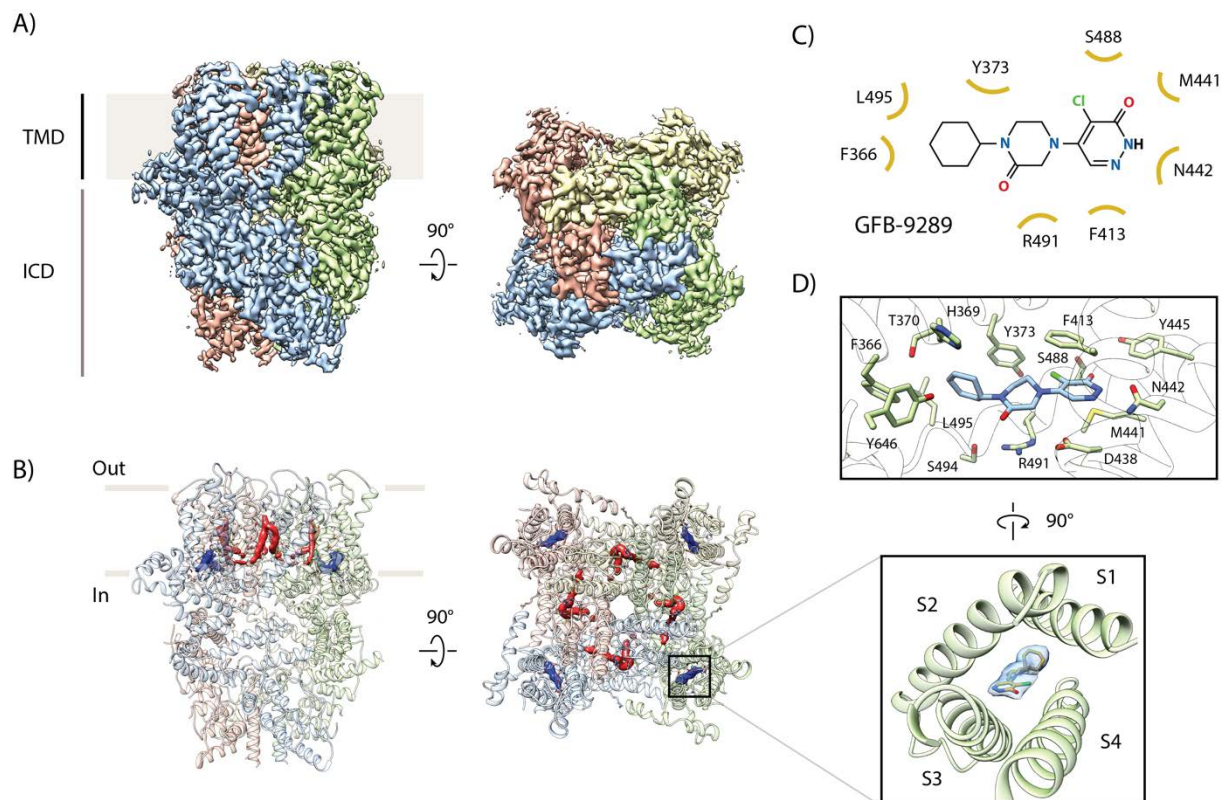

961

962

963

**Figure 2. Cryo-EM structure of activator-bound TRPC4 channel.**

964 (A) Side and top view of the cryo-EM map of GFB-9289 activator-bound TRPC4, with each  
 965 subunit colored differently. Positions of the transmembrane domain (TMD) and intracellular  
 966 cytosolic domain (ICD) are indicated.

967 (B) Location of non-protein densities relative to the atomic model of TRPC4, which is shown  
 968 in transparent ribbon representation in the side- and top view. Densities corresponding to lipids  
 969 are depicted in red, GFB-9289 is shown in blue.

970 (C) Chemical structure of the TRPC4 activator GFB-9289, with important and interacting  
 971 residues of TRPC4 highlighted. Non-carbon atoms are colored as in Figure 1.

972 (D) Close-up of the ligand binding pocket (bottom panel), showing the density corresponding  
 973 to the activator GFB-9289 in blue with the ligand structure modelled inside. The activator is  
 974 enclosed by the four helices S1 to S4 of the VSL domain. A rotated view of the ligand binding  
 975 pocket is shown in the top panel with important and interacting residues highlighted. GFB-9289  
 976 is shown in blue. Both the activator and inhibitor occupy the same ligand binding pocket.

977

978

979

980

981

982

983

984

985

986

987

988



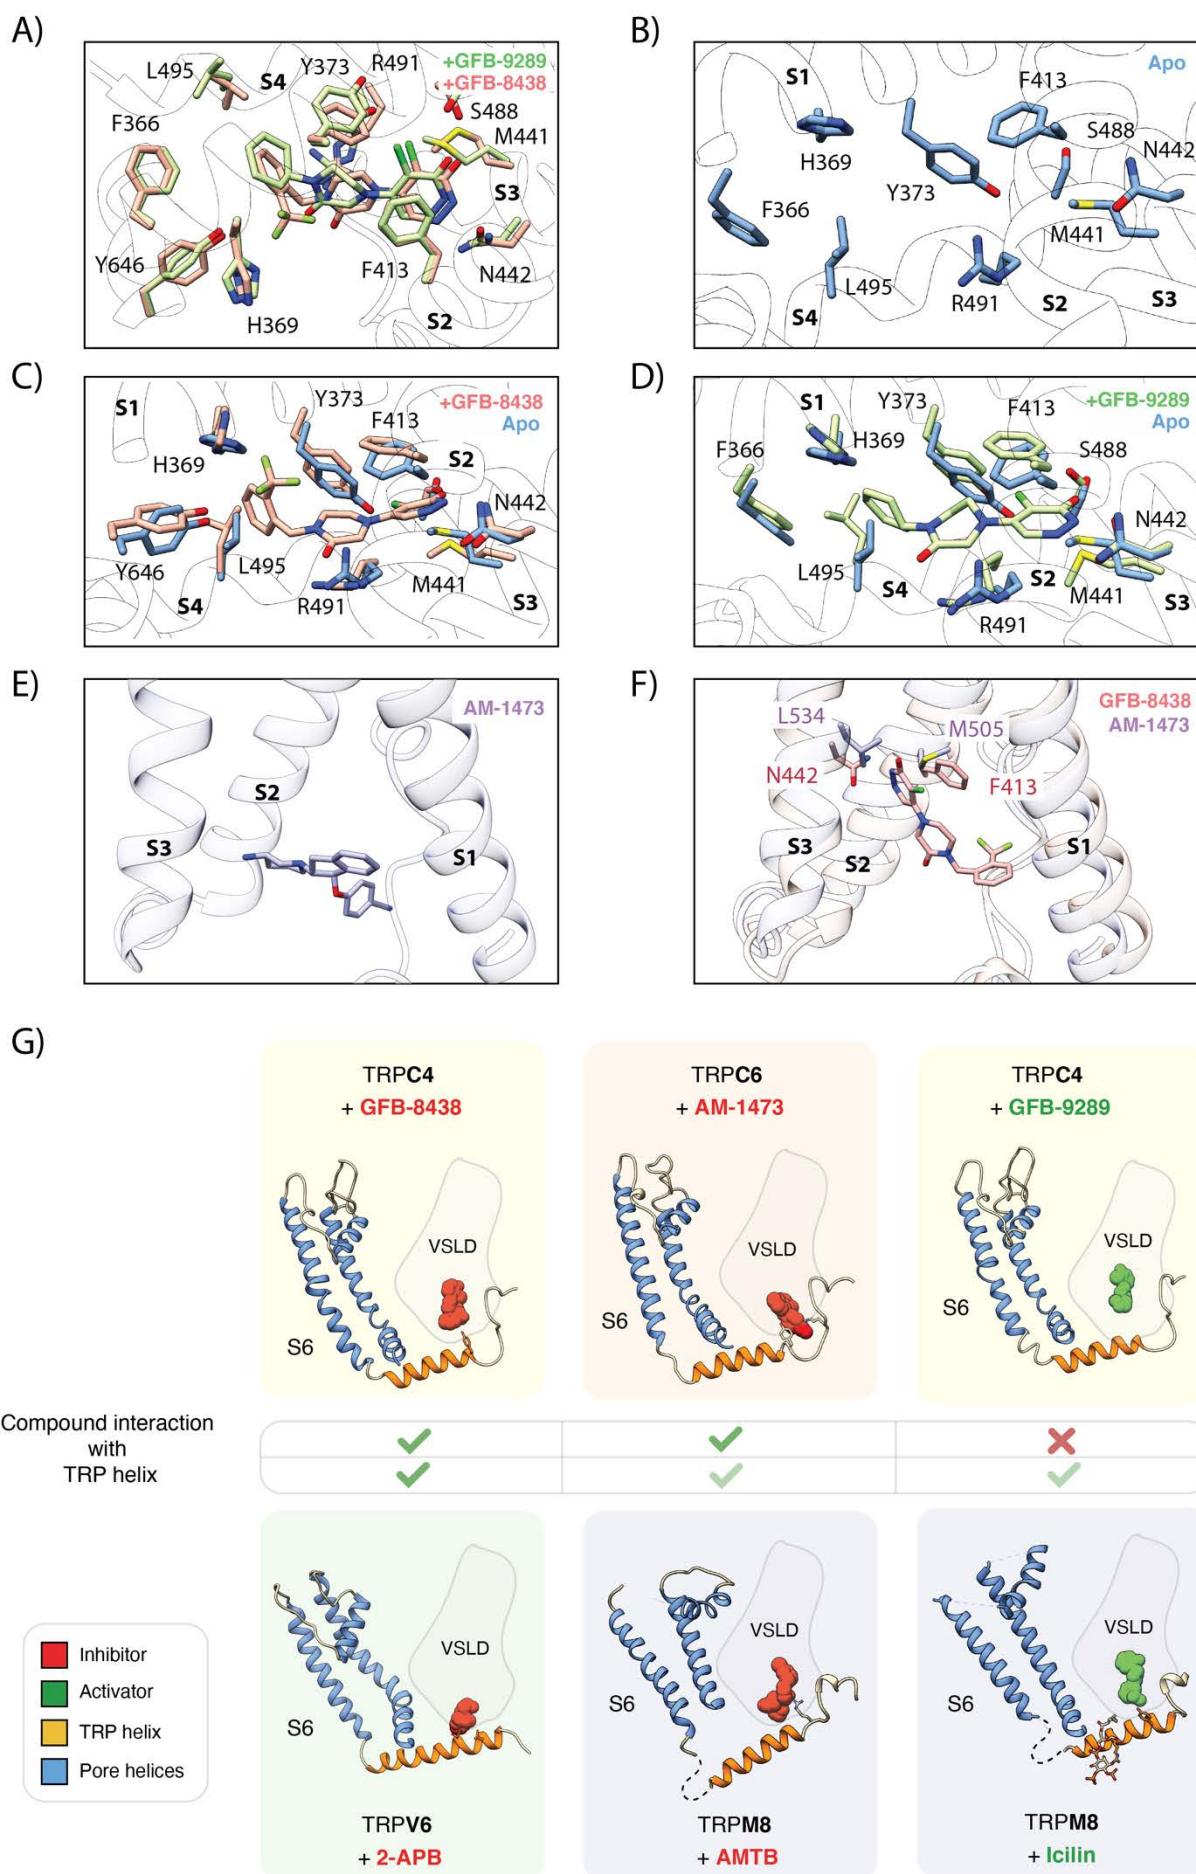



990 **Figure 3. Comparison of the ligand binding pocket in TRPC4.**

991 (A) Superposition of GFB-8438 inhibitor- (red) and GFB-9289 activator- (green) bound  
992 TRPC4 structures. The respective ligand is depicted in the same color as the corresponding  
993 residues. Positions of the surrounding helices S1 to S4 are indicated. Due to their structural  
994 similarity both molecules adopt a similar orientation within the ligand binding pocket.  
995 (B) Close-up of ligand binding pocket in the apo TRPC4 structure, which is enclosed by the  
996 four helices S1 to S4 of the voltage sensing-like domain.  
997 (C) Superposition of inhibitor-bound (red) and apo (blue) structure of TRPC4. A close-up of  
998 the ligand binding pocket is shown, with important and interacting residues highlighted. The  
999 inhibitor GFB-8438 is depicted in red, positions of the surrounding helices S1 to S4 are  
1000 indicated.  
1001 (D) Same as in (C) for the activator-bound TRPC4 structure, which is shown in green. The  
1002 structure of the activator GFB-9289 is also depicted in green. In both the activator- and  
1003 inhibitor-bound structures, several residues move away from the center of the pocket to create  
1004 space for accommodating the respective ligand.  
1005 (E) Position of the inhibitor AM-1473 within the VSL domain binding pocket of TRPC6 is  
1006 shown. The surrounding helices S1-S3 are indicated for orientation.  
1007 (F) Superposition of GFB-8438-bound TRPC4 (red) and AM-1473-bound TRPC6 (purple)  
1008 channels. The location of the GFB-8438 inhibitor within the VSL domain is shown. In contrast  
1009 to AM-1473, which is located in the lower part of the binding pocket (see E), GFB-8438  
1010 additionally interacts with the upper region of the pocket. The depicted residues in this region  
1011 contribute to the selectivity of GFB-8438 for TRP4/5 channels.  
1012 (G) Comparison of small molecule modulators of the TRP channel family that target the ligand  
1013 binding pocket enclosed by the helices of the VSL domain (VSLD). Small molecules are  
1014 depicted as space-filled spheres and colored according to their respective modulatory effect,  
1015 with inhibitors in red and activators in green. Residues interacting with the ligand are shown in  
1016 stick representation. Pore-forming helices are colored in blue, the TRP helix in orange. Within  
1017 the TRPC subfamily, inhibitors interact with the TRP helix, whereas activators do not.  
1018  
1019  
1020  
1021  
1022

1023  
1024

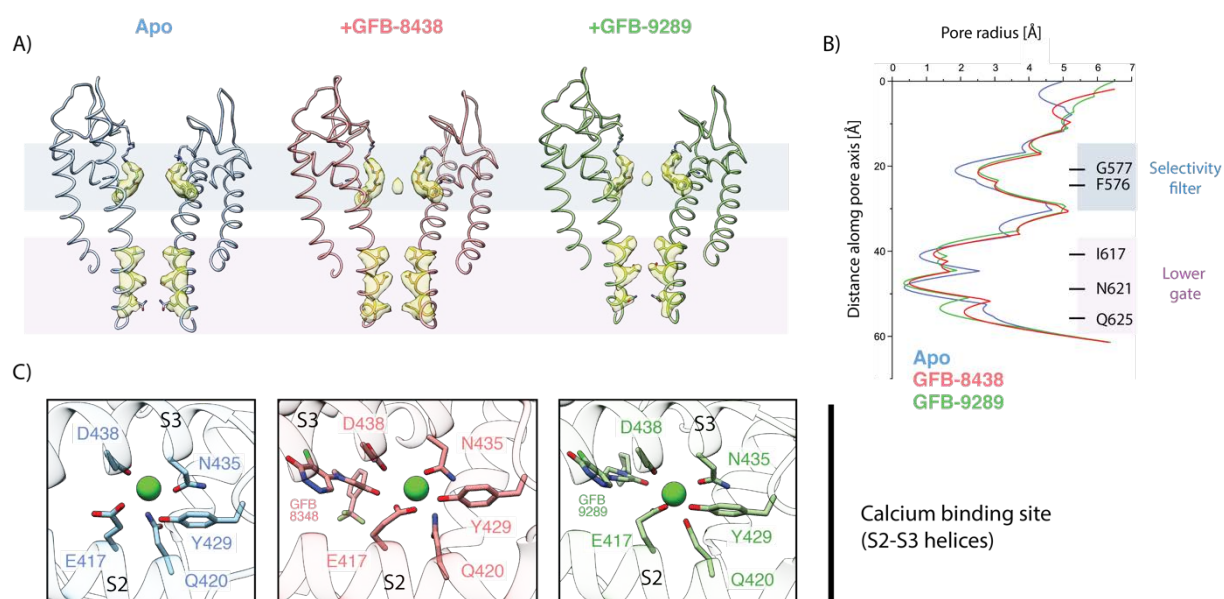

1025  
1026

1027 **Figure 4. Comparison of the ion conduction pore and Ca<sup>2+</sup>-binding site.**

1028 (A) Side view of the pore-forming region of TRPC4 in the apo- (blue), GFB-8438 inhibitor-  
1029 bound (red) and GFB-9289 activator-bound (green) structures. Only the two opposing subunits  
1030 of the tetrameric channel are shown as ribbon representation for clarity. The density at  
1031 comparable thresholds corresponding to the selectivity filter (light blue) and the lower gate  
1032 (pink) is superimposed. A central density is observed in all maps, except the apo structure.  
1033 (B) The calculated pore-radii corresponding to the three TRPC structures in (A) are depicted.  
1034 The color code is also identical to (A). The positions of important residues, constituting the  
1035 selectivity filter and the lower gate, are indicated on the right.  
1036 (C) Close-up of the Ca<sup>2+</sup>-binding site in the three TRPC4 structures, located in direct vicinity  
1037 to the ligand binding pocket of the VSL domain. Position of ligands and coordinating residues  
1038 are highlighted. Color code of TRPC4 structures is as in (A).

1039  
1040  
1041  
1042  
1043  
1044  
1045  
1046  
1047  
1048  
1049  
1050  
1051  
1052  
1053  
1054  
1055

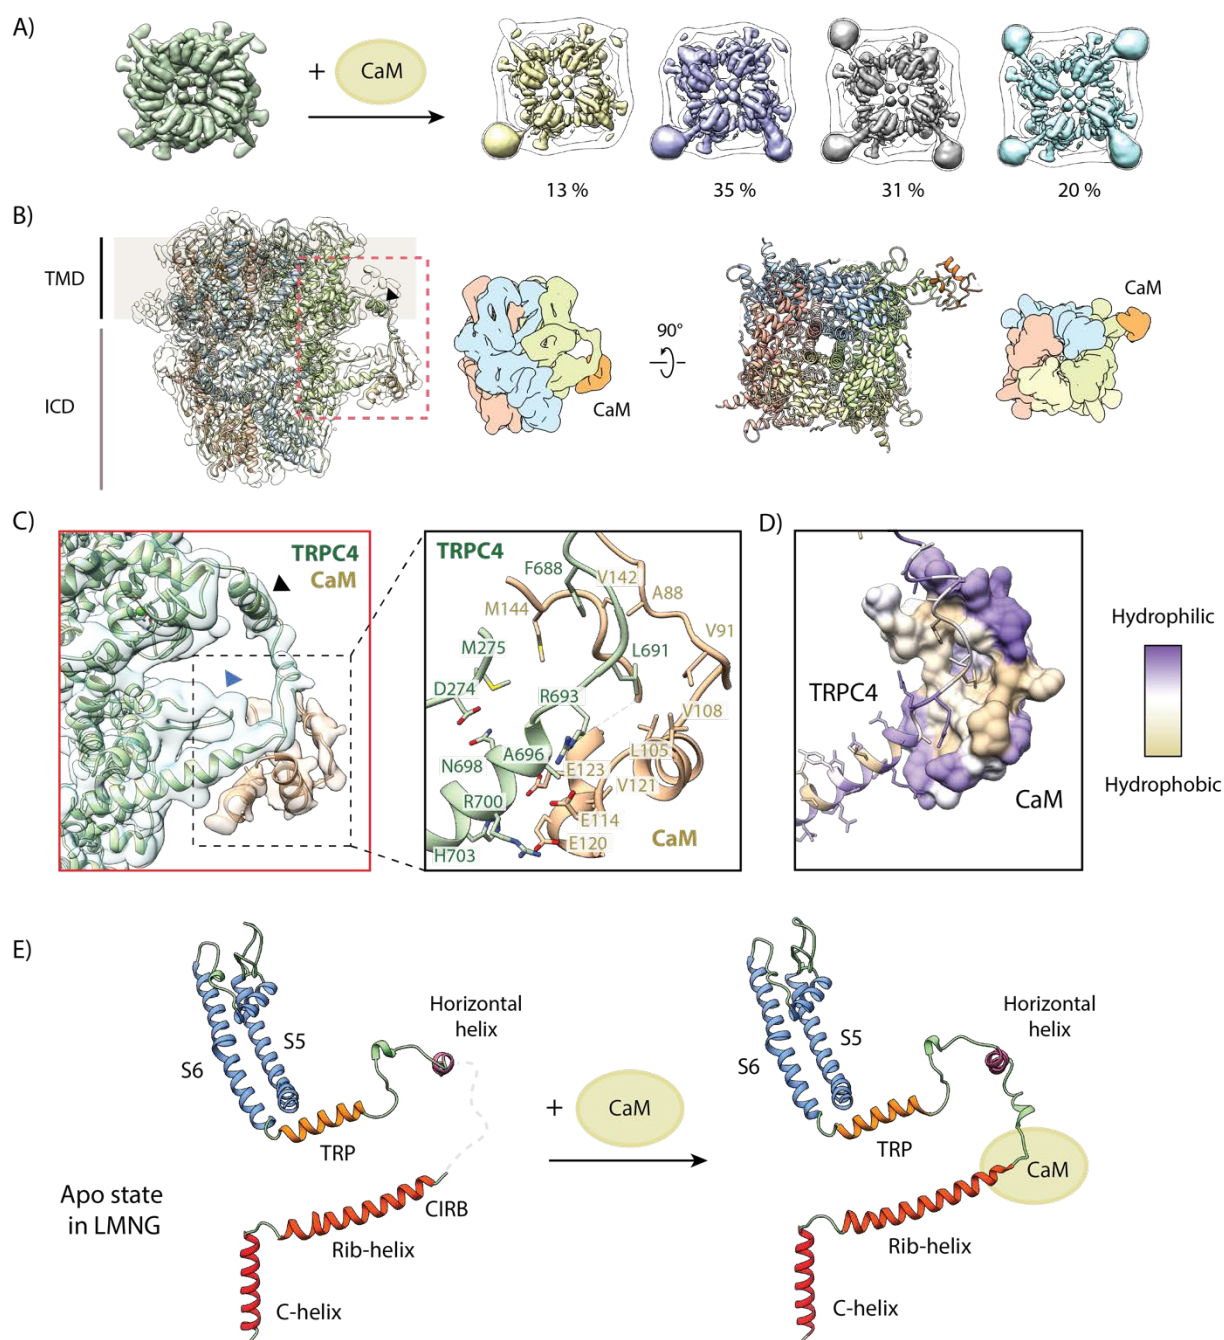

1056  
1057

1058 **Figure 5. Structural basis for inhibition of TRPC4 by calmodulin.**

1059 (A) One to four CaM molecules are bound to the CIRB binding sites of the tetrameric TRPC4  
1060 channel. 13% of particles are decorated with one (yellow), 35% with two (lilac), 31% with three  
1061 (grey) and 20% with four CaM molecules (turquoise).

1062 (B) Side view of the CaM-bound TRPC4 density map (transparent) with the corresponding  
1063 atomic model fitted inside, in which each protomer is colored differently. Position of the  
1064 horizontal helix is indicated by black arrowhead. The bottom view of the atomic model is shown  
1065 in the right panel. A schematic representation for both views is provided next to the pdb models.  
1066 CaM is colored in orange.

1067 (C) Close-up of the indicated region in (B), showing the CaM binding region (left panel). CaM  
1068 is colored in orange, TRPC4 in green. Positions of the horizontal helix and loop region 273-

1069 277 are indicated by black and blue arrowhead, respectively. Important and interacting residues  
1070 of TRPC4 and CaM are highlighted in the right panel.  
1071 **(D)** TRPC4 (cartoon representation) and CaM (surface representation) are colored according to  
1072 hydrophobicity. There is central hydrophobic cavity in CaM that is surrounded by hydrophilic  
1073 residues in its periphery. The complementary binding region of TRPC matches this profile.  
1074 **(E)** The C-terminal helix (red), the rib-helix (red-orange), the horizontal helix (purple), the TRP  
1075 helix (orange) and the pore-forming helices (blue) of a single TRPC4 promoter are shown  
1076 before (left panel) and after CaM binding (right panel). CaM binding stabilizes the previously  
1077 disordered region connecting the rib-helix and horizontal/TRP-helix. LMNG – lauryl maltose  
1078 neopentyl glycol  
1079

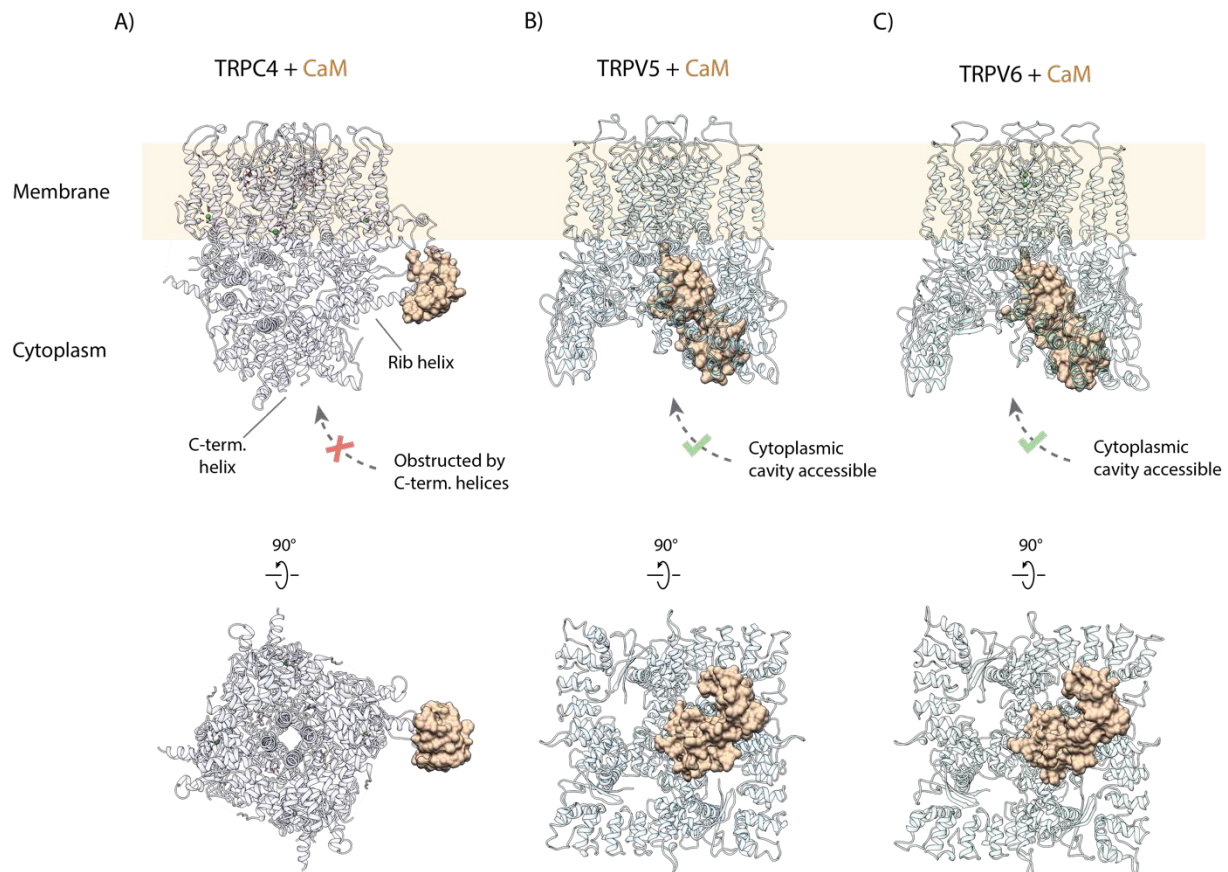

1080

1081

1082 **Figure 6. Comparison of CaM binding in TRPC and TRPV channels.**

1083 (A) Calmodulin (CaM) interacts with the rib helix of TRPC4. Side (upper panel) and bottom  
1084 (lower panel) view of the CaM-bound TRPC4 is shown, with TRPC4 structure in cartoon  
1085 representation with moderate transparency and CaM in space filling sphere representation. Only  
1086 a single lobe of the double-lobed CaM molecule is resolved in the structure. This indicates that  
1087 the second lobe is rather flexible. Up to four binding sites are accessible for CaM (only one  
1088 binding event is shown here for clarity).

1089 (B) Same as in (A) for TRPV5. The two-lobed CaM binds into the central cytoplasmic cavity  
1090 of TRPV5. While four potential binding sites are available in TRPV5, only a single CaM  
1091 molecule can bind due to steric hindrance. Unlike TRPC4, in which the C-terminal helices  
1092 block the access to the cytoplasmic cavity, CaM can enter into the internal cavity of TRPV5  
1093 from the cytoplasm.

1094 (C) Same as in (A) for TRPV6. Similar to TRPV5, only a single CaM molecule binds to a  
1095 region within the cytoplasmic cavity of TRPV6, indicating that this binding mode is conserved  
1096 among TRPV channels.

1097

1098

1099



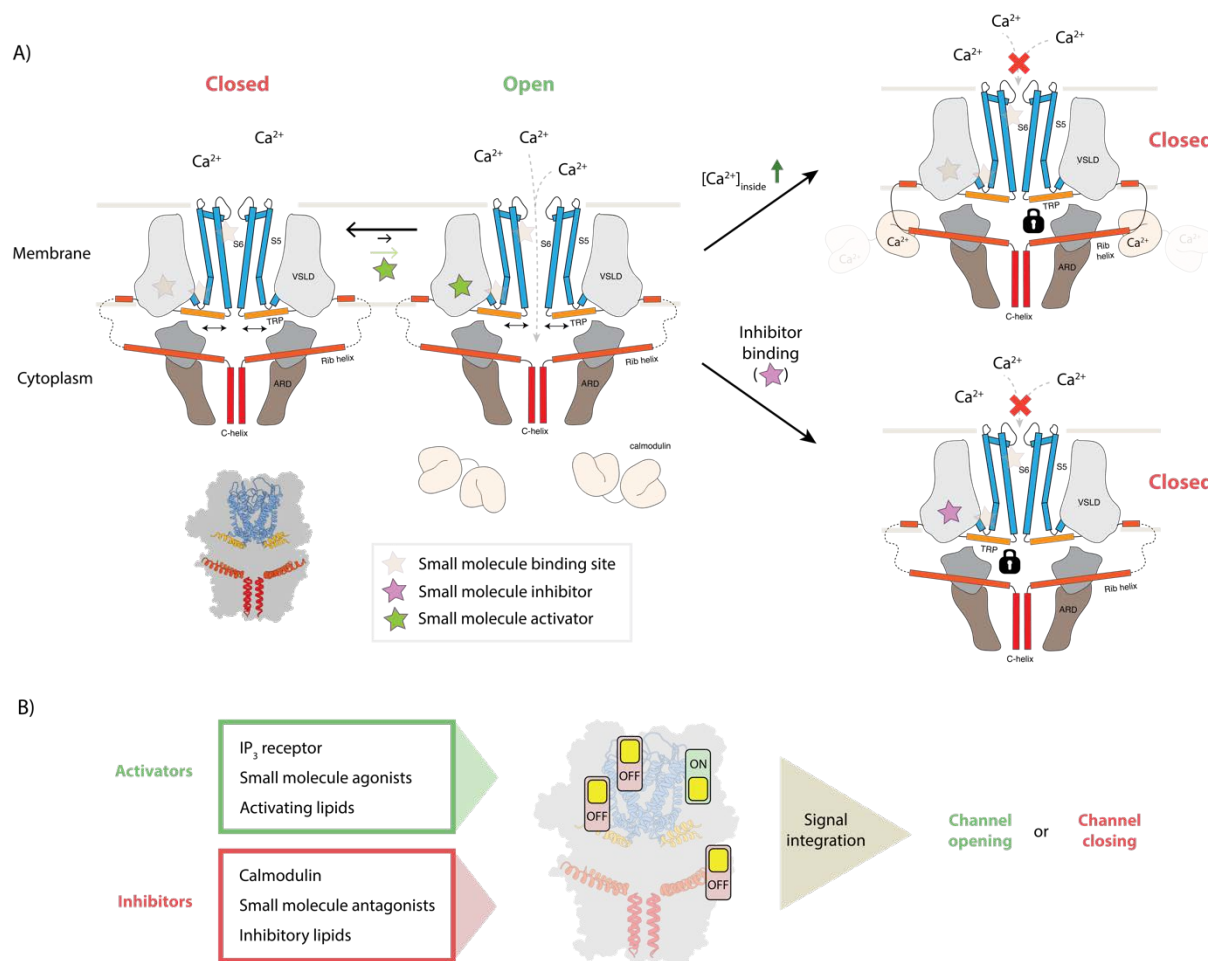



A) TRPC4-transfected cells

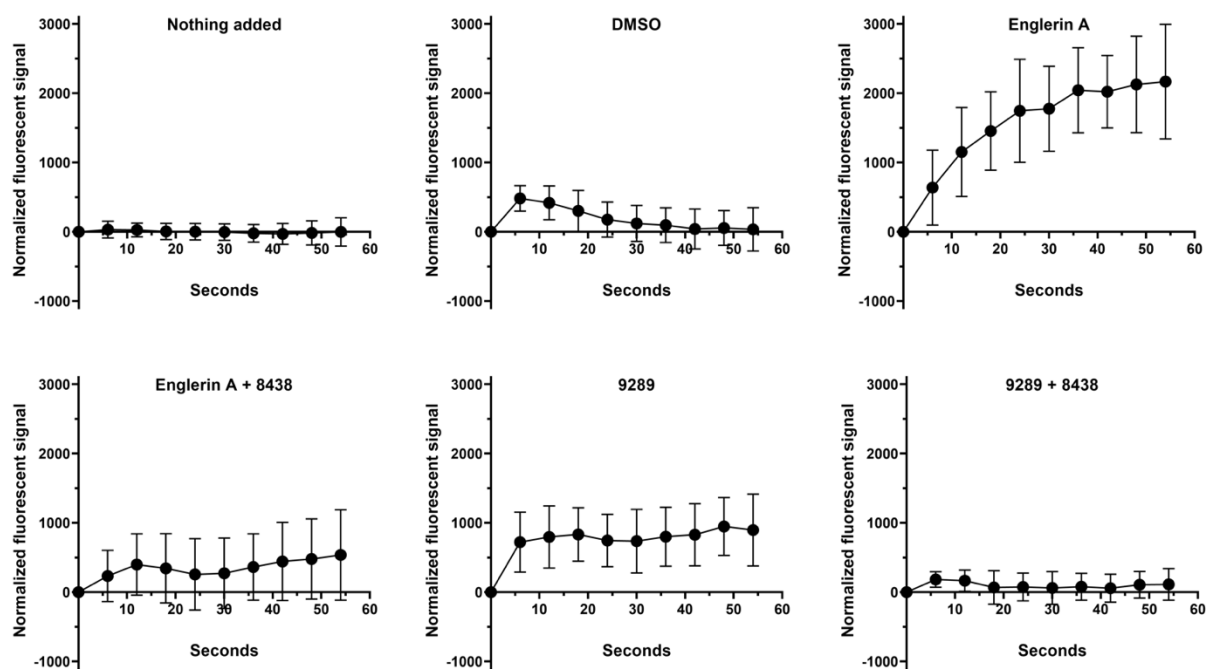

B) Non-transfected cells

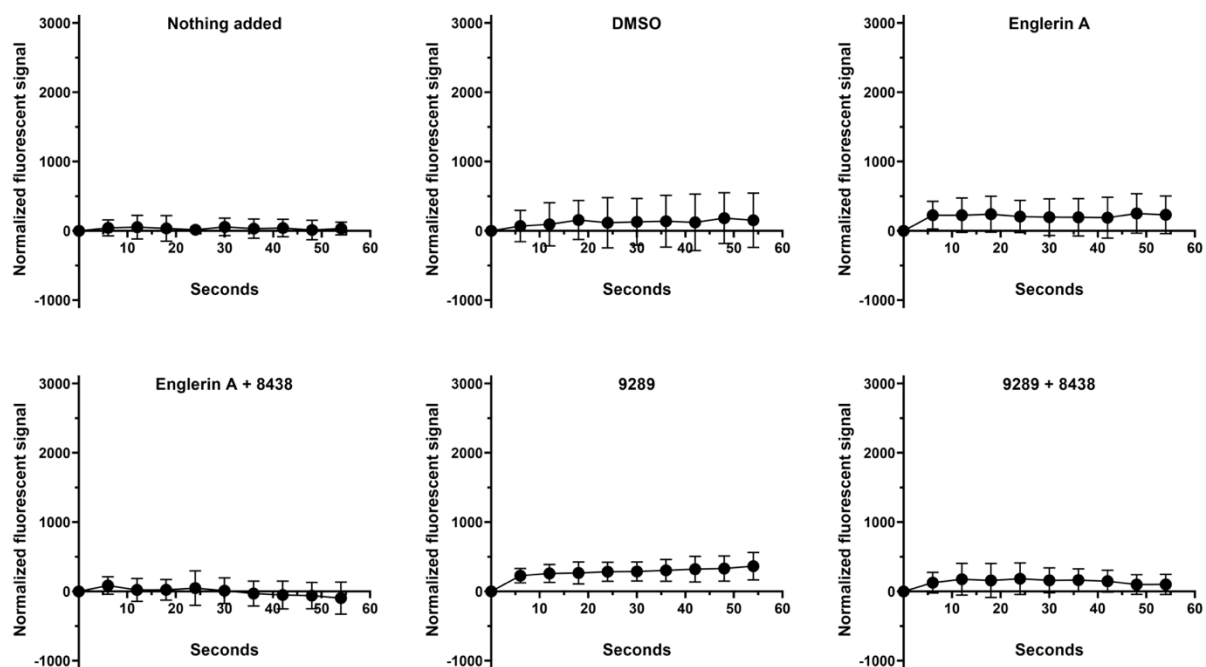

1123  
1124  
1125  
1126  
1127  
1128

1129

1130 **Figure S1. Effect of TRPC4 activators and inhibitors on Ca<sup>2+</sup> uptake in cells.**

1131

1132 (A) The effect of TRPC4 activators and inhibitors in a cellular context was assessed by  
1133 transfecting HEK293T cells with TRPC4, loading them with the Ca<sup>2+</sup>-sensing dye rhod-2, and  
1134 assessing the fluorescence at 581 nm of rhod-2 after incubation with either controls or TRPC4  
1135 activity-modulating compounds. Cells treated with the potent TRPC4 activator Englerin A  
1136 show a significant increase in rhod-2 fluorescence indicative of strong Ca<sup>2+</sup> influx. Incubation  
1137 with GFB-9289 also results in activation of the channel, albeit at a more modest level than  
1138 Englerin A. Prior incubation with GFB-8438 significantly decreases Ca<sup>2+</sup> influx into cells,  
1139 when activated by Englerin A or GFB-9289, highlighting its inhibitory function. (B) The same  
1140 experiment shown in (A) was also performed on non-transfected cells, demonstrating that the  
1141 effect of the tested activator and inhibitor on Ca<sup>2+</sup> influx was mainly due to modulation of  
1142 transfected TRPC4 activity.

1143

1144

1145

1146

1147

1148

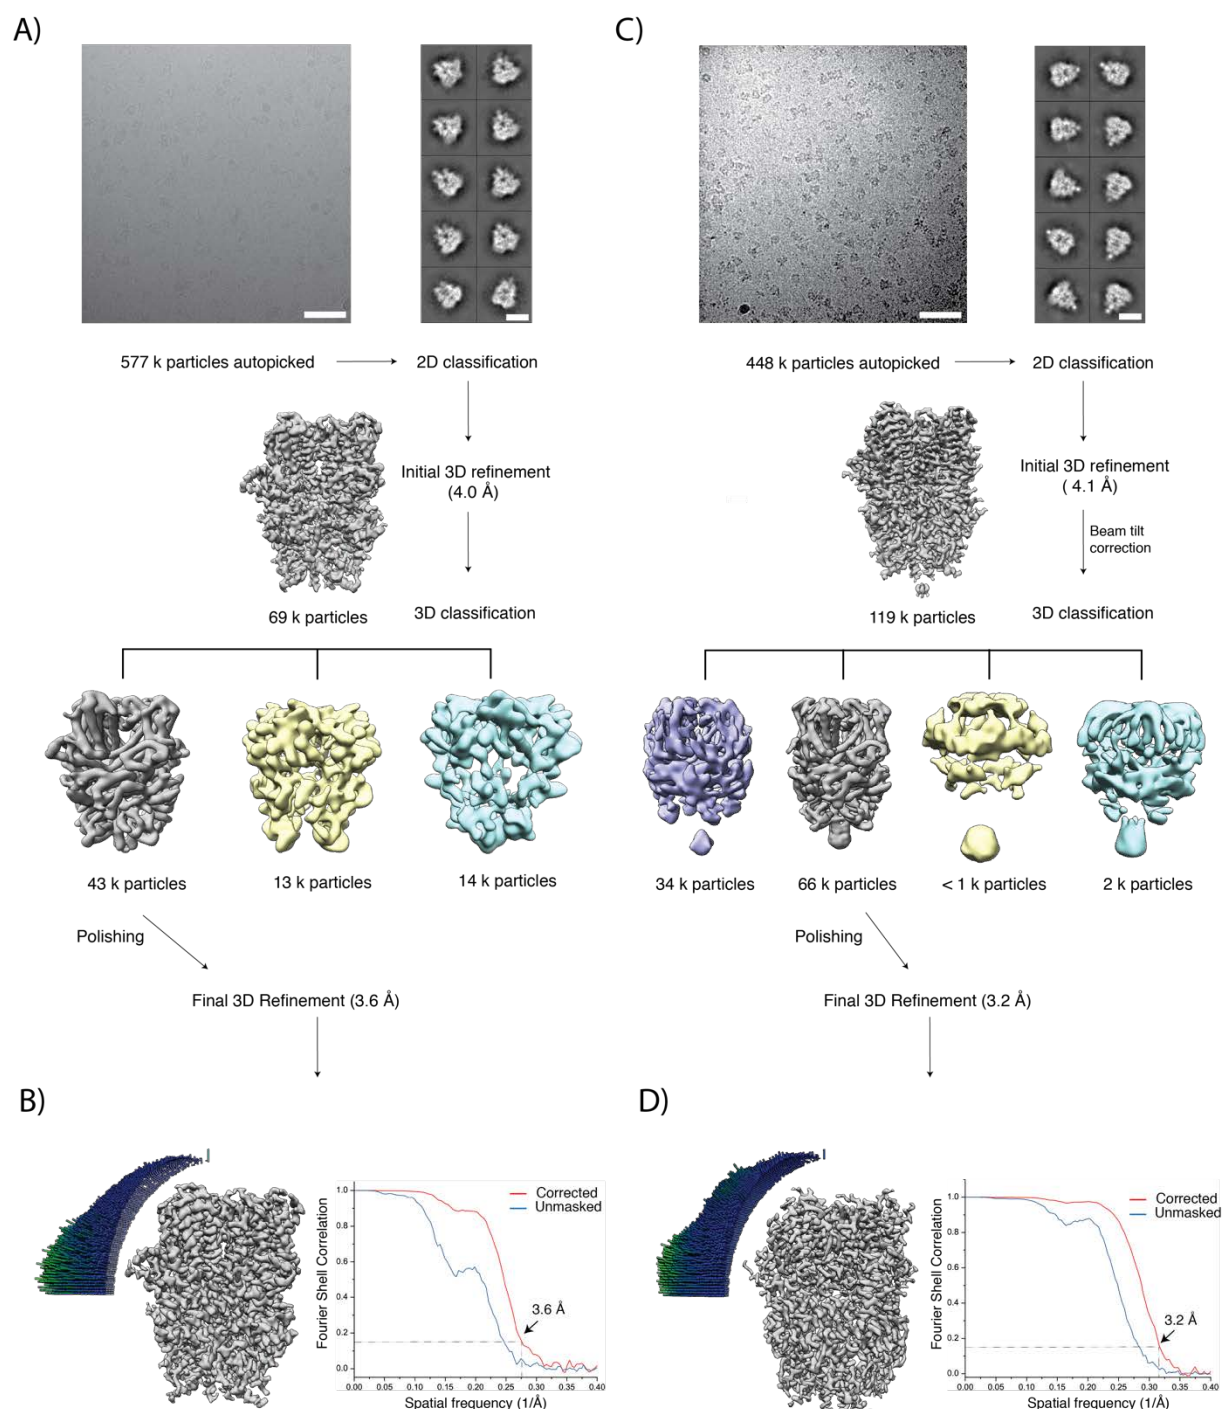

1149  
1150

1151 **Figure S2. Cryo-EM image processing workflow for TRPC4 in complex with the inhibitor**  
1152 **or activator.**

1153

1154 (A) The top panel shows a representative digital micrograph area and selected 2-D class  
1155 averages of inhibitor bound TRPC4. Scale bars, 50 nm and 10 nm, respectively. The initial  
1156 refinement density and subsequent densities obtained after 3D classification are shown in the  
1157 middle and bottom panel, respectively. (B) Angular distribution of particles used in the final  
1158 refinement and Fourier shell correlation curves (FSC) between the two independently refined  
1159 maps. The dotted lines indicate the 0.143 FSC criterion used for average resolution estimation.  
1160 (C, D) Same as in (A) and (B), respectively, but for the activator-TRPC4 complex.

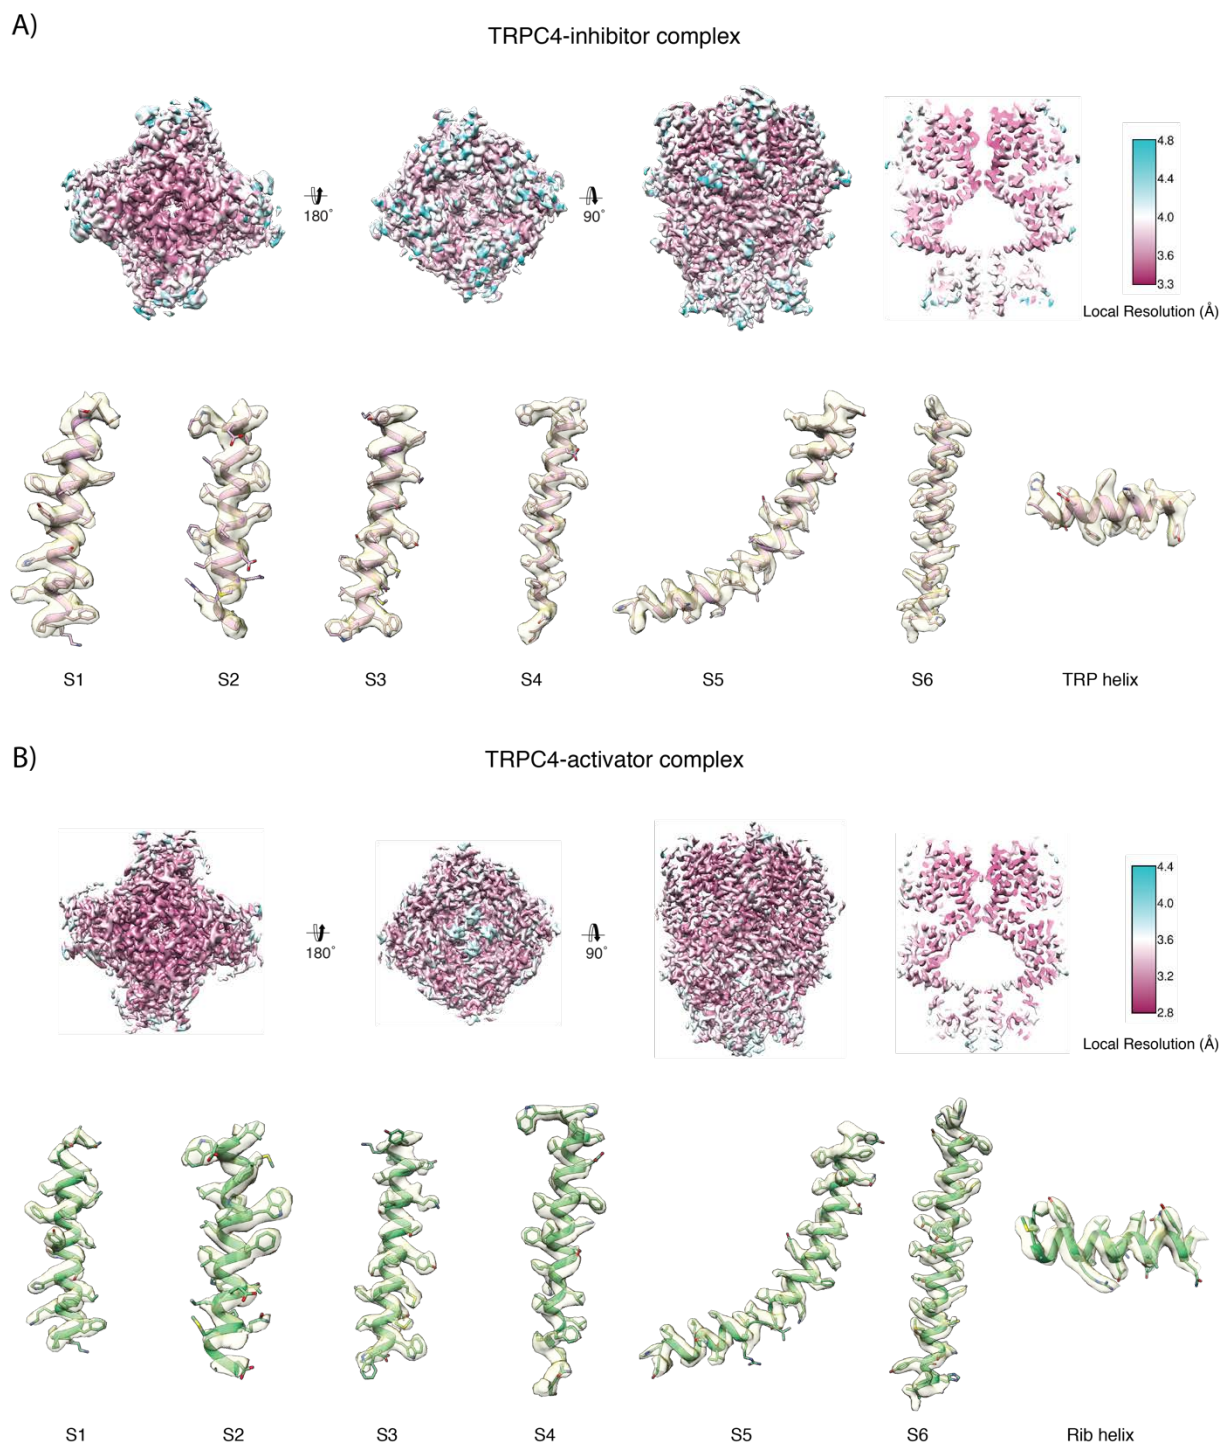

**Figure S3. Local resolution of the TRPC4-ligand complex maps.**

(A, B) Maps of inhibitor- (GFB-9289) and activator (GFB-8348)-bound TRPC4, respectively, coloured according to the local resolution. Representative regions of the density with the fitted atomic model are shown below the local resolution maps.

1172

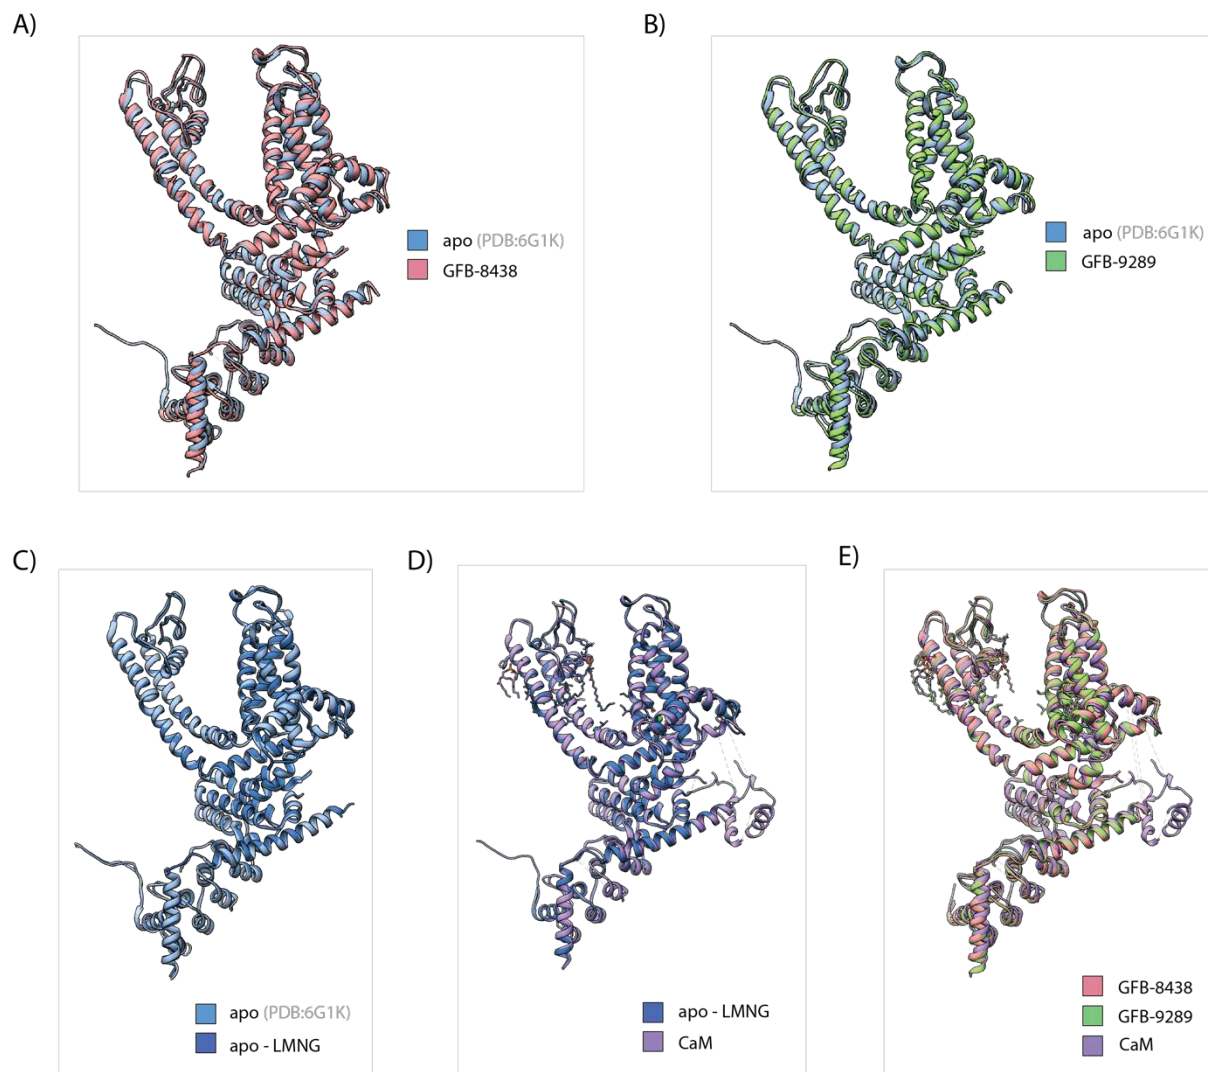

1173

1174

1175 **Figure S4. Comparison between different TRPC4 structures.**

1176

1177 (A) Structural alignment of a protomer of the inhibitor bound TRPC4 with that of TRPC4 in  
1178 its apo state. The protomer of the TRPC4 apo structure is shown in cartoon representation and  
1179 colored in light blue while the protomer of the inhibitor bound TRPC4 structure is colored in  
1180 light red. (B) Same as in (A) for the activator bound TRPC4. The protomer of activator bound  
1181 TRPC4 structure is shown in light green. (C) Alignment of the structures of TRPC4 solubilized  
1182 in amphipols or in the detergent LMNG. The protomer of apo-LMNG structure is shown in  
1183 dark blue. (D) Alignment of the TRPC4-CaM complex structure with the TRPC4 apo-LMNG  
1184 structure. The TRPC4-CaM complex is also solubilized in LMNG. The protomer of the TRPC4-  
1185 CaM structure is shown in purple. (E) Alignment of the TRPC4-activator, TRPC4-inhibitor and  
1186 TRPC4-CaM structures.

1187 Note: The C-terminal helix in 6GIK pdb has been corrected for domain swapping (See Method  
1188 section and Figure S12 for details)

1189

1190



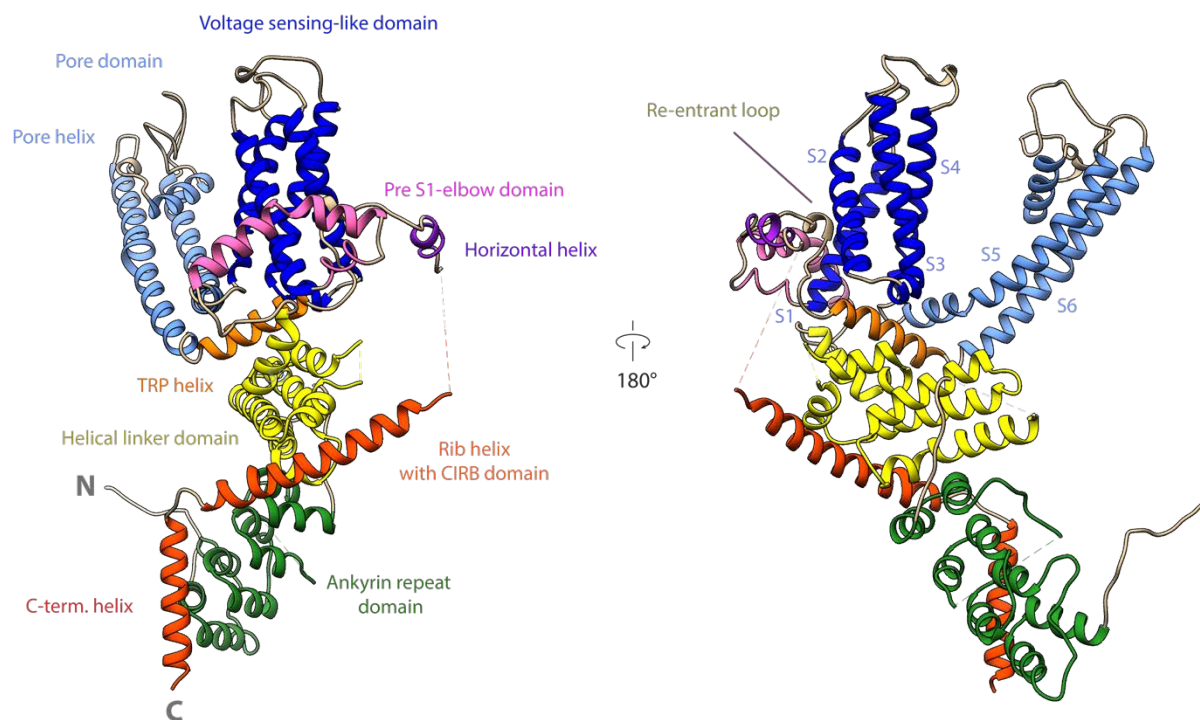

1191

1192 **Figure S5. Domain architecture of zebrafish TRPC4 channel.**

1193 Cartoon representation of a TRPC4 protomer. Each domain is shown in a different color and  
1194 labeled accordingly.

1195

1196



```
TRPC4_D.erio 1 ----- M S Q L Y F R - - - R 8
TRPC4_H.sapiens 1 ----- M A Q F Y Y K - - - R 8
TRPC5_H.sapiens 1 ----- M A Q L Y Y K - - - K 8
TRPC6_H.sapeins 1 M S Q S P A F G P R R G S S P R G A A G A A A R R N E S Q D Y L L M D S E L G E D G C P Q A P L P C Y G Y P C F R G 59

TRPC4_D.erio 9 T ----- D N S S Y R D R I P L - R I V R A E S E L S T Q E K S Y L S A V E K G D Y A S V K L A L 52
TRPC4_H.sapiens 9 N ----- V N A P Y R D R I P L - R I V R A E S E L S P S E K A Y L N A V E K G D Y A S V K K S L 52
TRPC5_H.sapiens 9 V ----- N Y S P Y R D R I P L - Q I V R A E T E L S A E E K A F L N A V E K G D Y A T V K Q A L 52
TRPC6_H.sapeins 60 S D N R L A H R R Q T V L R E K R R L A N R G P A Y M F S D R S T S L S I E E E R F L D A A E Y G N I P V V R K M L 118

TRPC4_D.erio 53 E E A E I Y F K I N I N C I D P L G R T A L L I A I E N E N L E I I E L L L S F N - - V Y V G D A L L H A I R K E V V 109
TRPC4_H.sapiens 53 E E A E I Y F K I N I N C I D P L G R T A L L I A I E N E N L E I I E L L L S F N - - V Y V G D A L L H A I R K E V V 109
TRPC5_H.sapiens 53 Q E A E I Y Y N V N I N C M D P L G R S A L L I A I E N E N L E I M E L L L N H S - - V Y V G D A L L Y A I R K E V V 109
TRPC6_H.sapeins 119 E E C - - - H S L N V N C V D Y M G Q N A L Q L A V A N E H L E I T E L L L K K E N L S R V G D A L L L A I S K G Y V 174

TRPC4_D.erio 110 G A V E L L L N H K K P S G E K Q V P - - - - - - P I L L D K Q F S D F T P D I T P I I L A A H T N N Y E 156
TRPC4_H.sapiens 110 P F L T A F L S W E L Q E L S K V E N E F K A Y E E L S R Q C K Q F A K D L L D Q T R S S R E L E I I L N H R D D 156
TRPC5_H.sapiens 110 G A V E L L L S Y R R P S G E K Q V P - - - - - - T L M M D T Q F S E F T P D I T P I M L A A H T N N Y E 156
TRPC6_H.sapeins 175 R I V E A I L S H P A F A E G K R L A T S P S Q S E L Q Q D D F Y A Y D E D G T R F S H D V T P I I L A A H C Q E Y E 233

TRPC4_D.erio 157 I I K M L V Q K G V S V P P H E V R C N C V E C V S S S D V D S L R H S R S R L N I Y K A L A S P S L I A L S S E D 215
TRPC4_H.sapiens 157 I I K L L V Q K G V S V P R P H E V R C N C V E C V S S S D V D S L R H S R S R L N I Y K A L A S P S L I A L S S E D 215
TRPC5_H.sapiens 157 I I K L L V Q K R V T I P R P H Q I R C N C V E C V S S S E V D S L R H S R S R L N I Y K A L A S P S L I A L S S E D 215
TRPC6_H.sapeins 234 I V H T L L R K G A R I E R P H D Y F C K C N D C N Q K Q K H D S F S H S R S R I N A Y K G L A S P A Y L S L S S E D 292

TRPC4_D.erio 216 P F L T A F L S W E L Q E L S K V E N E F K A Y E E L S H Q C K H F A K D L L D Q T R S S R E L E I I L N H R D D 274
TRPC4_H.sapiens 216 P F L T A F L S W E L Q E L S K V E N E F K A Y E E L S R Q C K Q F A K D L L D Q T R S S R E L E I I L N H R D D 274
TRPC5_H.sapiens 216 P I L T A F R L G W E L K E L S K V E N E F K A Y E E L S Q Q C K L F A K D L L D Q A R S S R E L E I I L N H R D D 274
TRPC6_H.sapeins 293 P V M T A L E L S N E L A V L A N I E K E F K N D Y K K L S M Q C K D F V V G L L D L C R N T E E V E A I L N G D V E 351

TRPC4_D.erio 275 M N L - L Q D E A N N E L A R L K L A I K Y R Q E F V A Q P N C Q Q L L A S R W Y D E F P G W R R R H W A G K L I T 332
TRPC4_H.sapiens 275 N S L - I E E Q S G N D L A R L K L A I K Y R Q E F V A Q P N C Q Q L L A S R W Y D E F P G W R R R H W A V K M V T 332
TRPC5_H.sapiens 275 H S E E L D P Q K Y H D L A K L K V A I K Y H Q E F V A Q P N C Q Q L L A T L W Y D G F P G W R R K H W V V K L L T 333
TRPC6_H.sapeins 352 - T L Q S G D H G R P N L S R L K L A I K Y E V K K F V A H P N C Q Q L L S I W Y E N L S G L R Q Q T M A V K F L V 409

TRPC4_D.erio 333 C V F I G L M F P L L S C Y L V A P K S R Y G L F I R K P F I K F I C H T A S Y L T F L F L L L L A S Q H I V S N N 391
TRPC4_H.sapiens 333 C F I I G L L F P V F S V C Y L I A P K S P L G L F I R K P F I K F I C H T A S Y L T F L F L L L L A S Q H I D R S D 391
TRPC5_H.sapiens 334 C M T I G F L F P M L S I A Y L I S P R S N L G L F I K P F I K F I C H T A S Y L T F L F M L L L A S Q H I V R T D 392
TRPC6_H.sapeins 410 V L A V A I G L P F L A L I Y W F A P C S K M G K I M R G P F M K F V A H A A S E T I F L G L L V M N A A D R F E G T 468

TRPC4_D.erio 392 - P - - - - - D R Q G P K P T - - - T V E W M I L P W V L G F I W T E I K Q M W D G G F Q D Y I H D W N N 435
TRPC4_H.sapiens 392 - L - - - - - N R Q G P P T - - - V E W M I L P W V L G F I W G E I K Q M W D G G L Q D Y I H D W N N 435
TRPC5_H.sapiens 393 - L - - - - - H V Q G P P T - - - I V E W M I L P W V L G F I W G E I K E M W D G G T E Y I H D W N N 436
TRPC6_H.sapeins 469 K L L P N E T S T D N A Q L F R M K T S C F S W M E M L I I S W V I G M I W A E C K E I W T Q G P K E Y L F E L W N 527

TRPC4_D.erio 436 L M D F V M N S L Y L A T I S L K I V A Y V K Y S G - - - - - C K P R D T W 468
TRPC4_H.sapiens 436 L M D F V M N S L Y L A T I S L K I V A F V K Y S A - - - - - L N P R E S W 468
TRPC5_H.sapiens 437 L M D F A M N S L Y L A T I S L K I V A Y V K Y N G - - - - - S R P R E E W 469
TRPC6_H.sapeins 528 M L D F G M L A I F A A S F I A R F M A F W H A S K A Q S I I D A N D T L K D L T K V T L G D N V K Y Y N L A R I K W 586

TRPC4_D.erio 469 E M W H P T L V A E A V F A I A N I F S S L R L I S L F T A N S H L G P L Q I S L G R M L D I L K F L F I Y C L V L 527
TRPC4_H.sapiens 469 D M W H P T L V A E A L F A I A N I F S S L R L I S L F T A N S H L G P L Q I S L G R M L D I L K F L F I Y C L V L 527
TRPC5_H.sapiens 470 E M W H P T L I A E A L F A I S N I L S S L R L I S L F T A N S H L G P L Q I S L G R M L D I L K F L F I Y C L V L 528
TRPC6_H.sapeins 587 D P S D P Q I I S E G L Y A I A V V L S F S R I A Y I L P A N E S F G P L Q I S L G R T V K D I F K F M V I F I M V F 645

TRPC4_D.erio 528 L A F A N G L N Q L Y F Y Y E N S - - - E G M T C K G I R C E R Q N N A F S T L F E T L Q S L F W S I F G L I S L Y V 583
TRPC4_H.sapiens 528 L A F A N G L N Q L Y F Y Y E E T - - - K G L T C K G I R C E K Q N N A F S T L F E T L Q S L F W S I F G L I N L Y V 583
TRPC5_H.sapiens 529 L A F A N G L N Q L Y F Y Y E T R A I D E P N N C K G I R C E K Q N N A F S T L F E T L Q S L F W S V F G L N L N Y V 587
TRPC6_H.sapeins 646 V A F M I G M F N L Y S Y Y I G A - - - - - K Q N E A F T V E E S F K T L F W A I F G L S E V K S 690

TRPC4_D.erio 584 T N V K A D H K F T E F V G A T M F G T Y N V I S L V V L L N M L I A M M N N S Y Q H I A D H A D I E W K F A R T K L 642
TRPC4_H.sapiens 584 T N V K A Q H E F T E F V G A T M F G T Y N V I S L V V L L N M L I A M M N N S Y Q L I A D H A D I E W K F A R T K L 642
TRPC5_H.sapiens 588 T N V K A R H E F T E F V G A T M F G T Y N V I S L V V L L N M L I A M M N N S Y Q L I A D H A D I E W K F A R T K L 646
TRPC6_H.sapeins 691 V V I N Y N H K F I E N I G Y V L Y G Y V N T M V I V L L N M L I A M I N S S F Q E I E D D A D V E W K F A R A K L 749

TRPC4_D.erio 643 W M S Y F E E G G T L P P P F N I I P S P K S I C Y L I - - - - T W I K V H V F K R R S - - - - - K R T E 686
TRPC4_H.sapiens 643 W M S Y F E E G G T L P T P F N V I P S P K S L W Y L I - - - - K W I W T H L C K K K M - - - - - R R K P E 687
TRPC5_H.sapiens 647 W M S Y F D E G G T L P P P F N I I P S P K S F L Y L G - - - - N W F N N T F C P K R D P D - - - - - G R R R R R 694
TRPC6_H.sapeins 750 W F S Y F E E G R T L P V P F N L V P S P K S L F Y L L L K L K K W I S E L F Q G H K K G F Q E D A E M N K I N E E K 808

TRPC4_D.erio 687 T F G T L G R R - - - - - A A E - - - - - N V R L N H Q Y Q E V L R N L V K R Y V 717
TRPC4_H.sapiens 688 S F G T I G R R - - - - - A A D - - - - - N L R R H H Q Y Q E V M R N L V K R Y V 718
TRPC5_H.sapiens 695 N L R S F T E R - - - - - N A D - - - - - S L I Q N Q H Y Q E I R N L V K R Y V 725
TRPC6_H.sapeins 809 K L G I L G S H E D L S K L S L D K K Q V G H N K Q P S I R S S E D F H L N S F N N P P R Q Y Q K I M K R L I K R Y V 867

TRPC4_D.erio 718 A A M I R D A K T E E G L T E E N F K E L K Q D I S S F R Y E V I G M M K G N R K S T R A N K S - - D T S A S D V S H 774
TRPC4_H.sapiens 719 A A M I R D A K T E E G L T E E N F K E L K Q D I S S F R F E V L G L L R G S K L S T I Q S A N - - A S K E S S N S A 775
TRPC5_H.sapiens 726 A A M I R N S K T H E G L T E E N F K E L K Q D I S S F R Y E V L D L L G N R K H P R S F S T S - - S T E L S Q R D D 782
TRPC6_H.sapeins 868 L Q A Q I D K - E S D E V N E G E L K E I K Q D I S S L R Y E L L E E K S Q N T E D L A E L I R E L G E K L S M E P N 925

TRPC4_D.erio 775 - - - - - P E G S - - - L Q Y S S A L K Q N S K L - - - H L Y D V T T A L Q Q Q N S E E A K A S L G C L A N G S A 820
TRPC4_H.sapiens 776 D S D E K S D S E E E V A R Q Q A A G P L E R N I Q L - - - E S - - - - - R G L A S R G D L 813
TRPC5_H.sapiens 783 - - - N N D G S G G A R A K S K - S V S F N L G C K K T C H G P P L I R T M P R S S G A Q G K S K A E S S S K R S F 837
TRPC6_H.sapeins 926 Q E E T N R - - - - - - - - - - - - - - - - - - - - - - - - - - - - - - - - - - - - - - - - - - - - - - - 931

TRPC4_D.erio 821 V - - V L - - - - - T E P - I L K D K A R S D F P K D F T D - - - - 842
TRPC4_H.sapiens 814 S I P G L - - - - - S E Q C V L V D H R E - - - - R N T D T - - - - 834
TRPC5_H.sapiens 838 M G P S L K K L G L L F S K F N G H M S E P S S E P M Y T I S D G I V Q Q H C M W Q D I R Y S Q M E K G K A E A C S Q 896
TRPC6_H.sapeins -----

TRPC4_D.erio 843 - - - - - F G L F P K - - - K - Q N P N K I Y S L - - - - - A E E A T E S D P D - I L D W G K E D K 877
TRPC4_H.sapiens 835 - - - - - L G L Q V G - - - K R V C P F K S E K V - - - - - V V E D T V P - I I P K E K H A K 867
TRPC5_H.sapiens 897 S E I N L S E V E L G E V Q G A A Q S S E C P L A C S S L H C A S S I C S S N S K L L D S S E D V F E T W G E A C D 955
TRPC6_H.sapeins -----

TRPC4_D.erio 878 P L A G K V E Q D V N E S K C L M E E D E R V L E E Q E M E H I A S S H E H 915
TRPC4_H.sapiens 868 E E D S S I D Y D L N L P D T V T H E D Y V T T - - - - R L - - - - 893
TRPC5_H.sapiens 956 - - - - - L L M H K W G D G G E E Q V T T R L - - - - - 973
TRPC6_H.sapeins -----
```

1198 **Figure S6. Sequence alignment of zebrafish TRPC4, human TRPC4, TRPC5, and TRPC6.**

1199

1200 The highlighted and marked residues denote the conserved residues in TRPC4 and TRPC5  
1201 interacting with the inhibitor GFB 8438. The residues highlighted in red colour shows the  
1202 critical difference between TRPC4/5 and TRPC6 for the inhibitor binding site.

1203



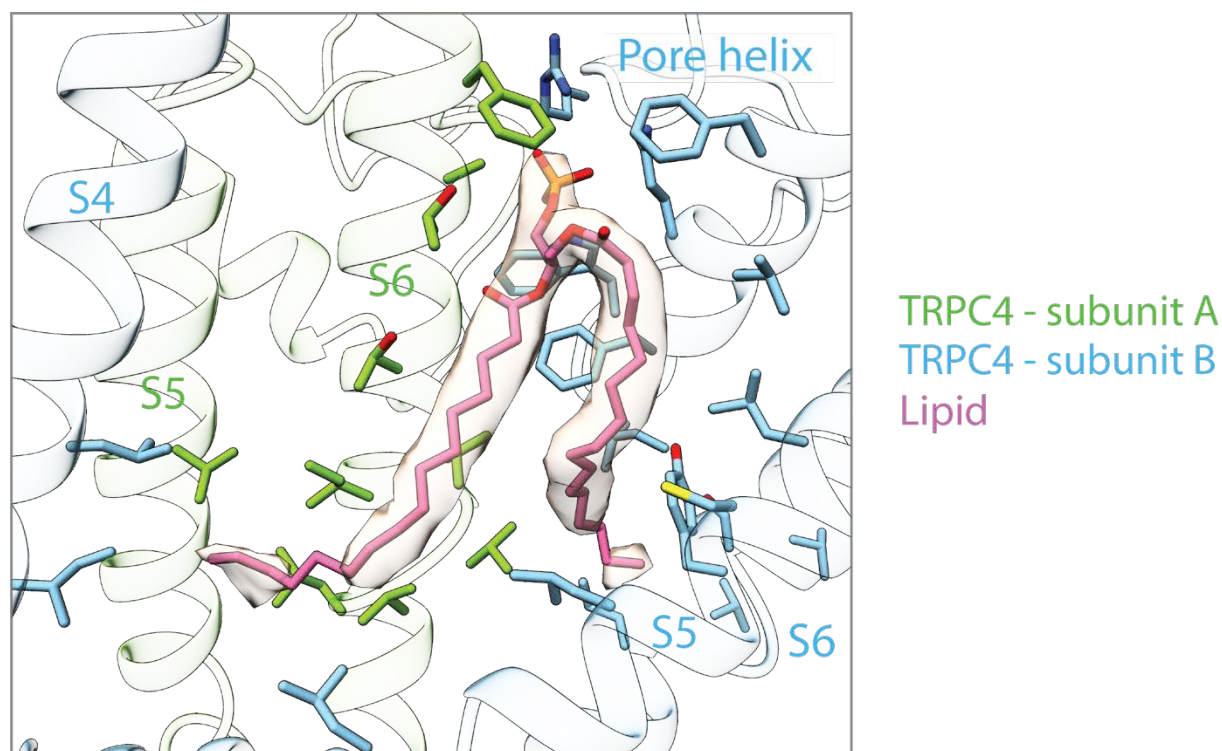

↻ - 90°

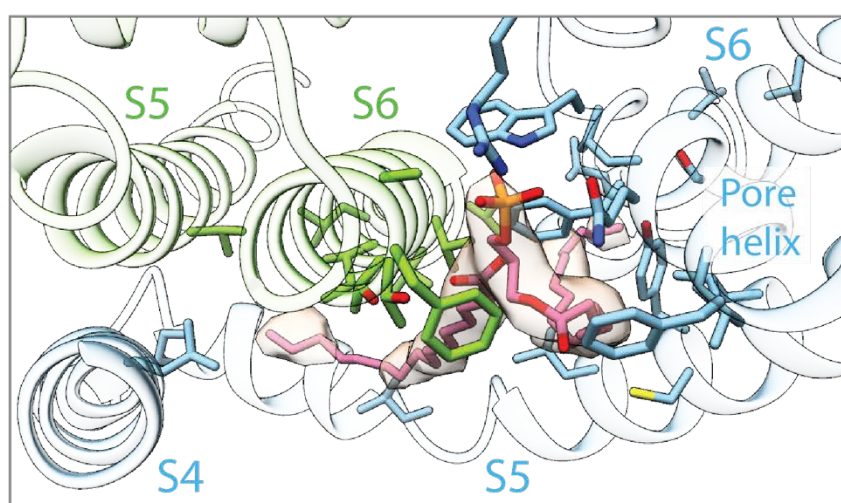

1204

1205

1206 **Figure S7. Different views of the lipid binding pocket at the interface between two**  
1207 **subunits.**

1208 Phosphatidic acid (pink) that binds at the interface between two subunits near the pore region  
1209 is shown in stick representation along with the corresponding density. The interacting residues  
1210 from the S4, S5 and S6 helices are also shown in stick representation. The protein residues from  
1211 different protomers are colored differently. The helices are shown in cartoon representation  
1212 with high transparency.

1213

A)

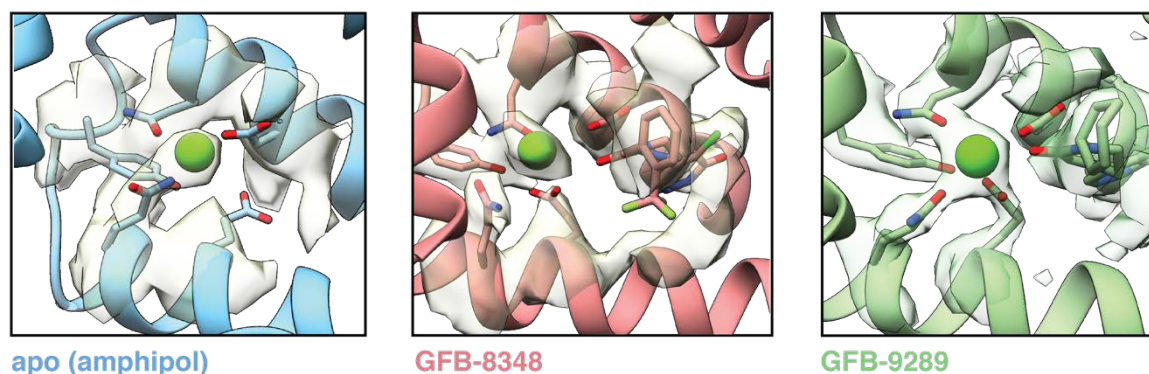

B)

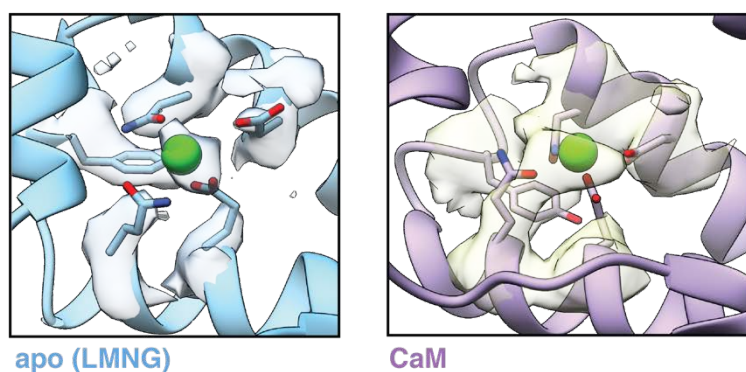

1214  
1215

1216 **Figure S8. Ca<sup>2+</sup>-binding site in the VSL domain of apo and ligand bound TRPC4.**

1217

1218 **(A)** Close-up view of the Ca<sup>2+</sup>-binding site in apo and ligand bound TRPC4 determined in  
1219 amphiphols. The coordinating residues in the Ca<sup>2+</sup> ion binding site and the modelled Ca<sup>2+</sup> ion  
1220 are shown in stick and sphere representation along with their densities. The oxygen atom of the  
1221 ligand molecules is situated close to the bound Ca<sup>2+</sup>-ion. **(B)** Close-up view of the Ca<sup>2+</sup>-binding  
1222 site in apo and TRPC4-CaM complex determined in presence of Lauryl Maltose Neopentyl  
1223 Glycol (LMNG). The external addition of Ca<sup>2+</sup> ion during the TRPC4-CaM complex  
1224 preparation reflects its strong density. The different structural forms shown in (A) and (B) are  
1225 color coded and named accordingly.

1226

1227

1228

1229

1230

1231

1232

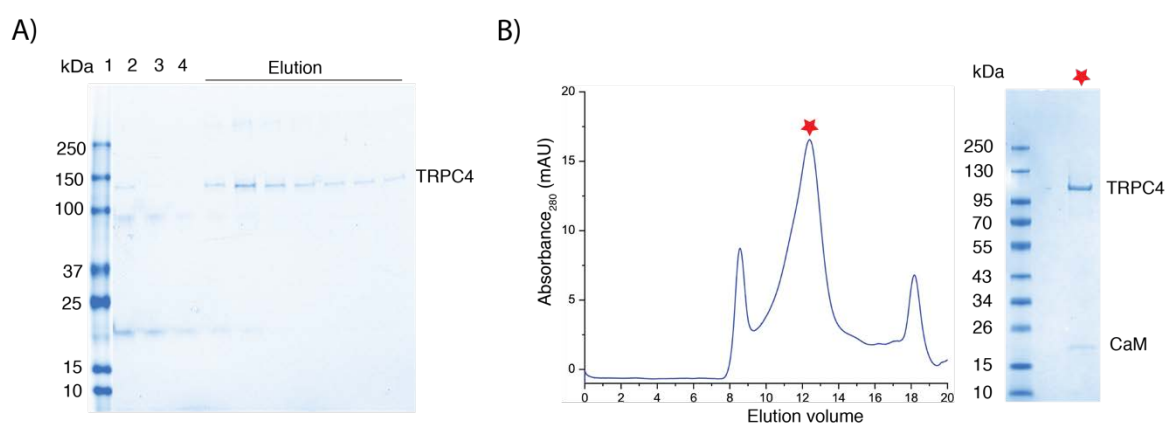

1233  
1234  
1235  
1236

**Figure S9. Analysis of CaM binding to TRPC4 by biochemical methods.**

1237 (A) SDS gel electrophoresis analysis of the TRPC4 pull down experiment performed with a  
1238 CaM Sepharose column. Lane 1 - protein size marker, lane 2 - TRPC4 input, lane 3 - flow  
1239 through, lane 4 - wash, remaining lanes - elution fractions. (B) Gel filtration analysis of the  
1240 TRPC4-CaM complex. The peak fraction containing the TRPC4-CaM complex are indicated  
1241 by a star were further analysed by SDS gel electrophoresis (right panel).

1242  
1243  
1244  
1245

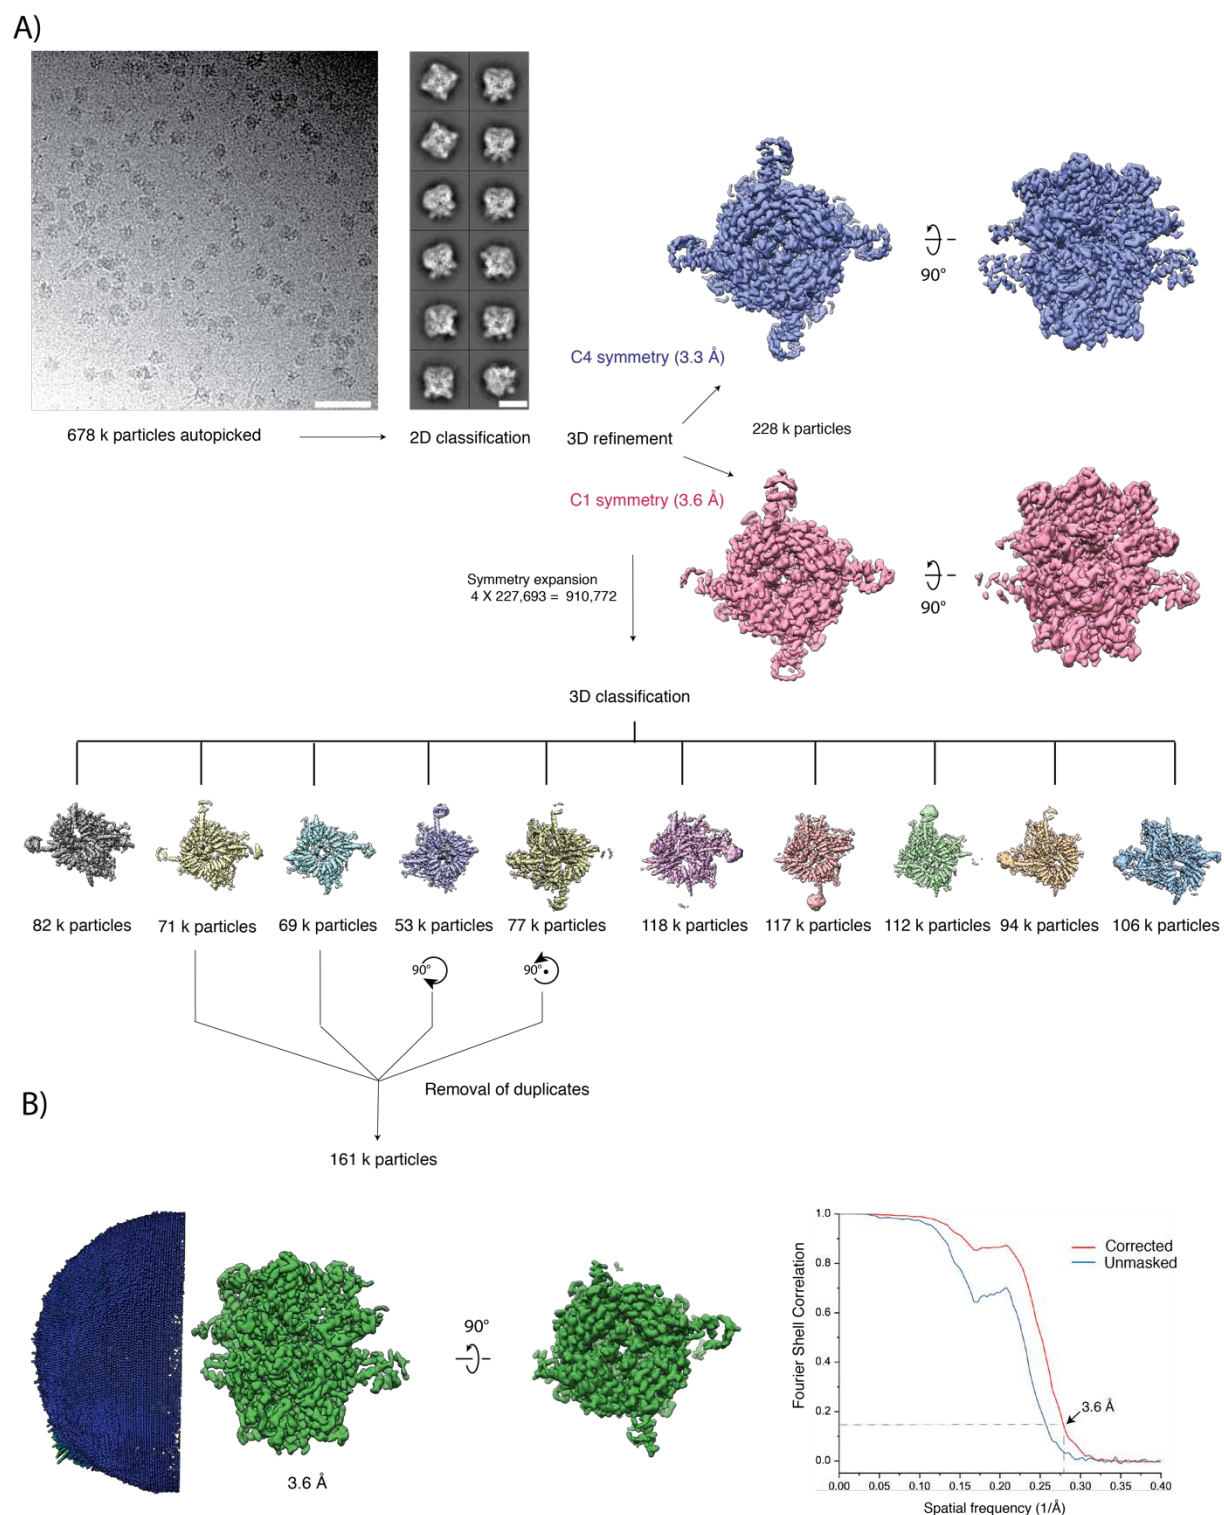

1246  
1247

1248 **Figure S10. Cryo-EM image processing of the TRPC4- CaM complex.**

1249

1250 (A) The top left panels show a representative digital micrograph area and selected class  
1251 averages of the TRPC4-CaM complex. Scale bars, 50 nm and 10 nm, respectively. The initial  
1252 refinement densities obtained without symmetry (red) and with C4 symmetry (blue) are shown  
1253 in the top right panel. The middle panel shows densities of different subclasses obtained with  
1254 3-D classification after symmetry expansion. Four subclasses were selected, rotated as indicated  
1255 and used for the final refinement after removal of duplicates. (B) Angular distribution of



1256 particles used in the final refinement and Fourier shell correlation curves (FSC) between the  
1257 two independently refined maps. The dotted lines indicate the 0.143 FSC criterion used for  
1258 average resolution estimation.  
1259

1260  
1261

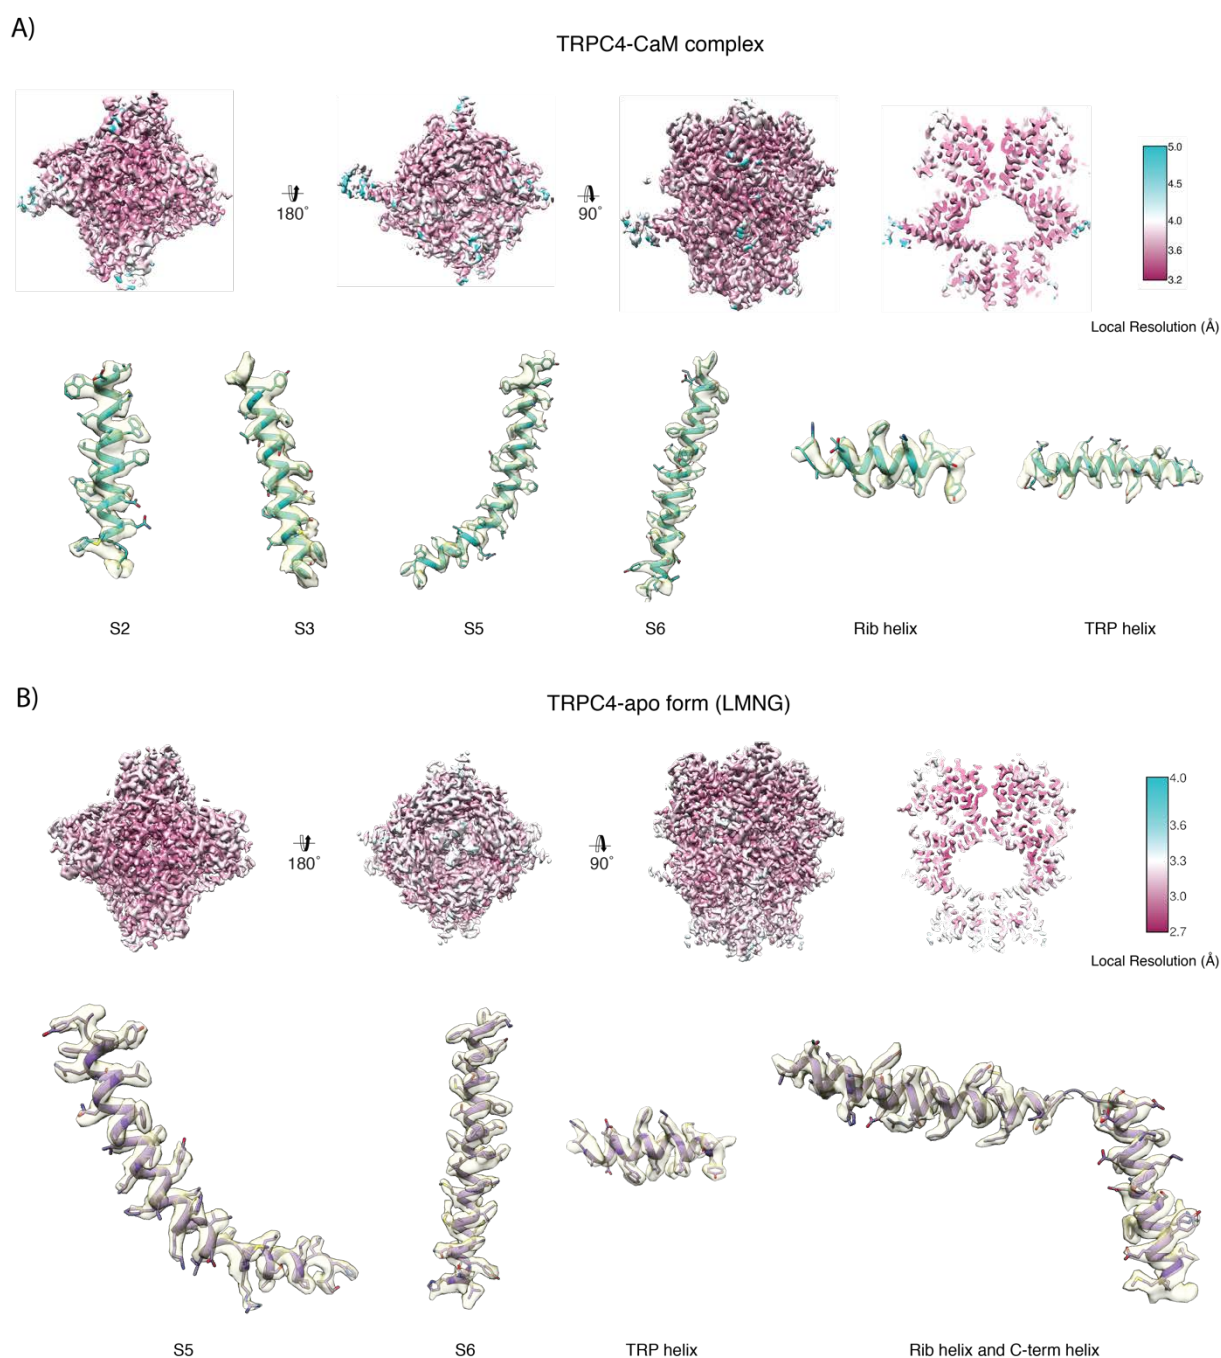

1262  
1263  
1264  
1265  
1266  
1267  
1268  
1269  
1270

**Figure S11. Local resolution maps of TRPC4-apo (LMNG) and TRPC4-CaM.**

(A, B) Maps of TRPC4-apo (LMNG) and TRPC4-CaM, respectively, coloured according to the local resolution. Representative regions of the density with the fitted atomic model are shown below the local resolution maps.

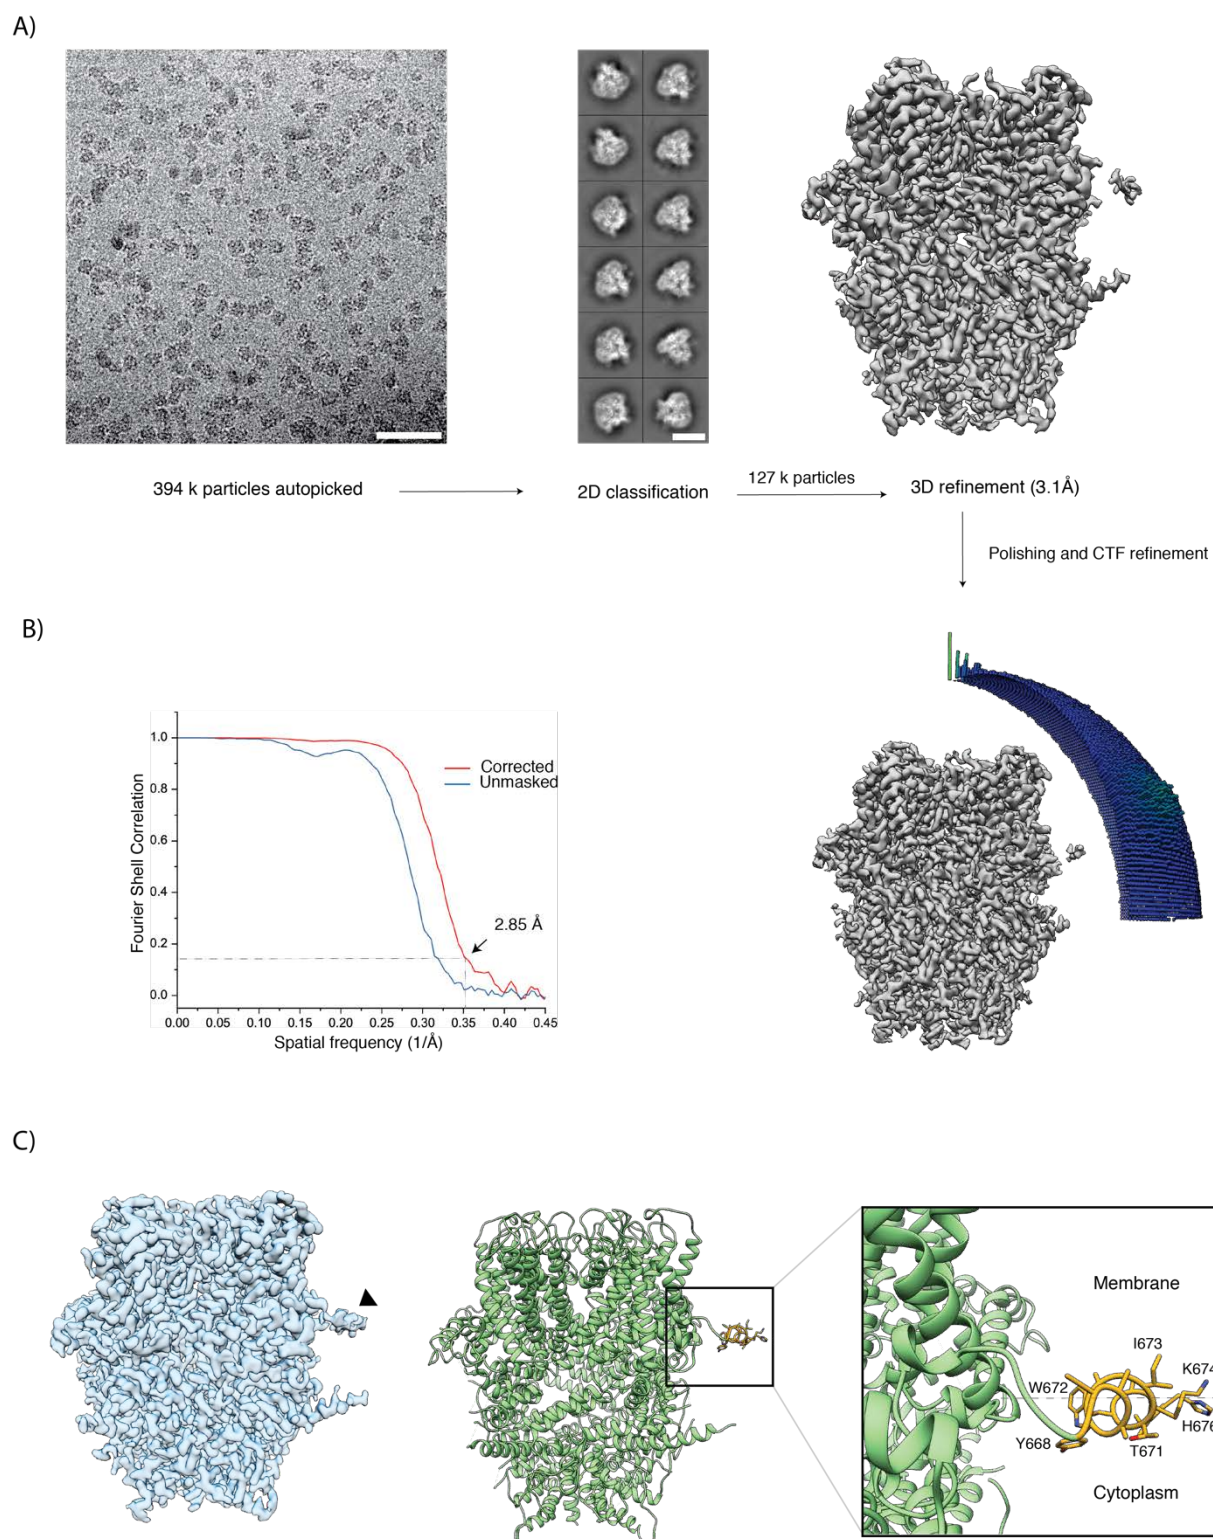

1271  
1272

1273 **Figure S12. Cryo-EM image processing and structure determination of TRPC4**  
1274 **solubilized in LMNG.**

1275

1276 (A) The top left panels show a representative micrograph and class averages of TRPC4  
1277 solubilized in LMNG. Scale bars, 50 nm and 10 nm, respectively. The density resulting from  
1278 the initial 3D refinement is shown in the top right panel. (B) Angular distribution of particles  
1279 used in the final refinement and Fourier shell correlation curves (FSC) between the two

1280 independently refined maps. The dotted lines indicate the 0.143 FSC criterion used for average  
1281 resolution estimation. **(C)** The final map, filtered using LAFTER, shows a clear density  
1282 corresponding to a horizontal helix (indicated with an arrowhead) (left panel). The  
1283 corresponding structure in cartoon representation with the residues of the horizontal helix  
1284 shown in golden yellow (middle panel). Zoom-in view of the horizontal helix (right panel).  
1285

1286  
1287

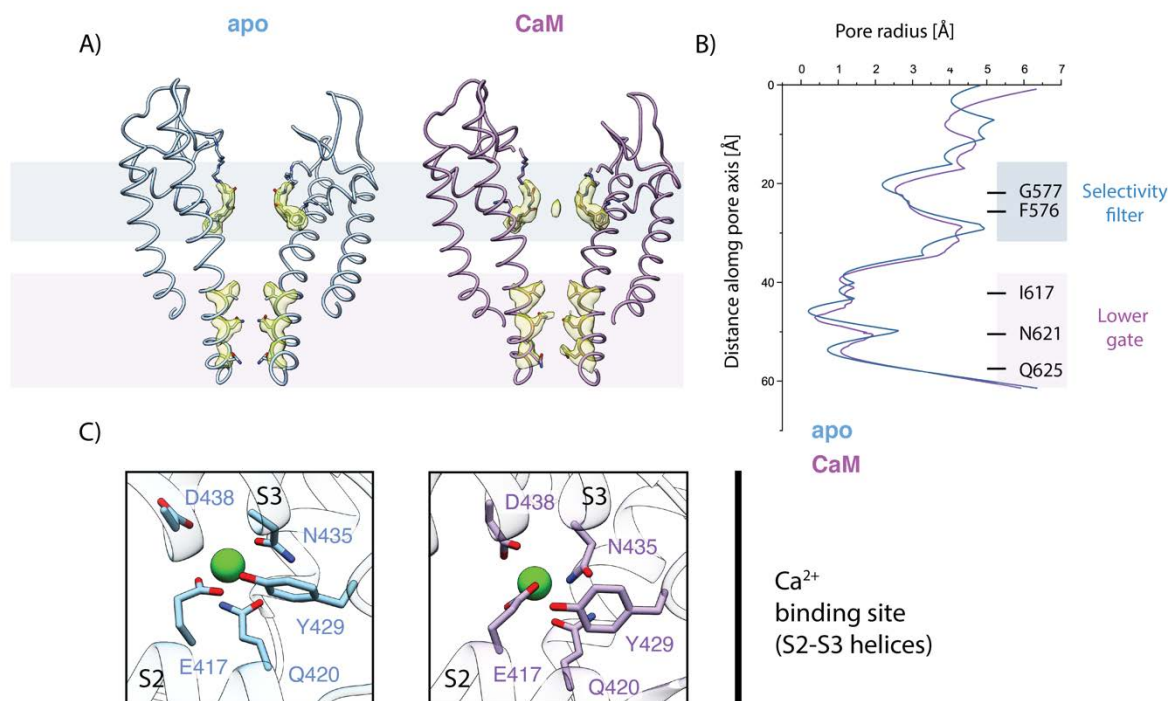

1288  
1289  
1290  
1291  
1292

**Figure S13. Comparison of the ion conduction pore and Ca<sup>2+</sup>-binding site.**

1293 (A) Side view of the pore-forming region of TRPC4 in the apo (LMNG)- (blue), and CaM-  
1294 bound (purple) structures. Only the two opposing subunits of the tetrameric channel  
1295 are shown as ribbon representation for clarity. The density at comparable thresholds corresponding to the  
1296 selectivity filter (light blue) and the lower gate (pink) is superimposed. Note, only in the  
1297 TRPC4-CaM complex structure an additional density occupies the center of the selectivity  
1298 filter. (B) The calculated pore radii corresponding to the structures in (A) are depicted. The  
1299 color code is identical to (A). The positions of important residues, constituting the selectivity  
1300 filter and the lower gate, are indicated on the right. (C) Close-up view of the Ca<sup>2+</sup>-binding site  
1301 in the VSL domain of TRPC4-apo (LMNG) (left) and TRPC4-CaM (right). Ca<sup>2+</sup> ion is shown  
1302 as green sphere and interacting residues are highlighted. Color code of TRPC4 structures is as  
1303 in (A).

1304

1305

1306

1307
